# Supplementary material for: Biological carbon fixation benefits evaluation model construction and application based on atomic economy concept
Source: Research Square preprint supplement (doi:10.21203/rs.3.rs-6051952/v1), 2025-03-03
Supplement: Supplementary file 1 [file d42bf4f210d58332df4350de.docx]

**Supplementary Information**

Biological carbon fixation benefits evaluation model construction and application based on atomic economy concept

**Authors:**

Mengdie Wang1,3, Zhiyao Peng1, Kaixing Xiao1, Jingzhao Chen3, Ziqiang Niu3, Shuna Yang3, Feng Huo2,3 *, Ting Song2*, Dan Wang1*

**Affiliations:**

1 School of Chemistry and Chemical Engineering, Chongqing University, Chongqing, 401331, China.

2 Beijing Key Laboratory of Solid State Battery and Energy Storage Process, CAS Key Laboratory of Green Process and Engineering, State Key Laboratory of Mesoscience and Engineering

Institute of Process Engineering, Chinese Academy of Sciences, Beijing, 100190, China.

3 Longzihu New energy Laboratory, Zhengzhou Institute of Emerging Industrial Technology, Zhenzhou, 450000, China.

* To whom correspondence should be addressed. Email: dwang@cqu.edu.cn; huofeng@ipe.ac.cn; tings@ipe.ac.cn

**Materials and methods**

**Intelligent feature mining strategies to obtain datasets**

The specific implementation of each process of intelligent data extraction is as follows. It includes five processes in total. The extraction focused on enzymatic kinetic features and their measurement conditions (Supplementary Table 1).

**Process 1: Batch Acquisition and Preprocessing of PDF Files.** In this study, PDF files related to carbonic anhydrases were batch-acquired from the Web of Science, Google Scholar, Elsevier ScienceDirect, and ACS databases using the keywords "Enzyme name" and "Substrate name" and "Kinetic Measurements". The PDF contents were divided into text and table components for preprocessing. The text was extracted using Python's PDF toolkit and segmented into paragraphs of 500 tokens each, ensuring sentence integrity. Table data was extracted in bulk using PDF processing software and stored in Excel files to provide a foundation for subsequent analysis.

**Process 2: Construction of the Paragraph Classification Model.** The description of enzymatic kinetic characteristics and corresponding measurement conditions is typically concentrated within one or a few paragraphs. Therefore, to accurately extract information on enzymatic kinetic measurement conditions, this study employed paragraph similarity matching to identify relevant sections in the literature (Supplementary Fig. 12). The extraction of enzymatic kinetic measurement condition paragraphs was framed as a paragraph classification problem. A Bag-of-Words model was introduced, which splits the paragraph content into words, counts the frequency of each word, and normalizes the values, converting the text into a vector where each position corresponds to a specific word, and the value at that position represents the word's frequency. Paragraphs obtained in Process 1, which describe enzymatic kinetic features, were labeled as class "1" while non-kinetic feature descriptions were labeled as class "0" The paragraphs were vectorized using the CountVectorizer module from scikit-learn. Subsequently, DT, SVM, RF, XGB, GBT, and neural network models were used for classification, with a 70:30 training-to-test ratio. Nested five-fold cross-validation and grid search algorithms were employed to optimize hyperparameters and build an improved classification model.

**Process 3: Intelligent Extraction of Table Data.** Enzymatic kinetic information in the literature is often presented in table format. However, the structural diversity of tables limits the effectiveness of conventional extraction tools. In this study, we utilized the "moonshot-v1-32k" model from Moonshot AI, combined with prompt engineering, to analyze each table extracted in Process 1. This approach enabled the extraction of carbonic anhydrase kinetic parameters and measurement conditions (see Supplementary Table 1). The extracted data were compared with manually extracted values, and through iterative optimization of the prompt engineering process, we ensured a high degree of consistency between the AI-extracted data and the manually extracted data.

This study utilizes Moonshot AI’s latest "moonshot-v1-32k" model as an intelligent extraction tool. Similar to the GPT series, it is a pretrained text generation model capable of understanding natural language and generating outputs. To ensure efficient table data extraction, a simplified workflow was designed (Supplementary Fig. 13a). Step 1: Identifies *kcat*, *Km*, and *kcat*/*Km* values within tables. If at least two of these parameters are present, the process proceeds; otherwise, the data is discarded. Steps 2 & 3: Locate the substrate name corresponding to the kinetic parameters, extracting only data for enzymes using CO2, methanol, formate, formaldehyde, or HCO3⁻ as substrates. The data is then standardized to reduce post-processing efforts. Step 4: Reviews previous steps to ensure complete data extraction.

Given the diversity of table structures, this basic workflow alone is insufficient. To enhance feature extraction, the prompt engineering process was refined by incorporating target specifications, requirements, examples, and key considerations, enabling adaptation to varied table formats. The extraction process was continuously optimized through manual validation of the dataset. The final optimized prompt engineering strategy consists of five modules (Supplementary Figs. 14a, b). To ensure data integrity, token limits of different models were considered, and input sizes were adjusted accordingly during extraction.

**Process 4: Intelligent Extraction of Text Content.** For the paragraphs classified as "1" in Process 2, this study combined manual extraction expertise with prompt engineering to design a targeted approach for batch extraction using the "moonshot-v1-32k" model. The extracted results were compared with manually obtained data, and prompt engineering was iteratively adjusted until the AI-extracted results aligned closely with the manually extracted ones.

This study utilizes Moonshot AI’s latest “moonshot-v1-32k” model as an intelligent extraction tool. Similar to the GPT series, it is a pretrained text generation model capable of understanding natural language and generating outputs. To ensure efficient table data extraction, a simplified workflow was designed (Supplementary Fig. 13b). Step 1: Identifies *kcat*, *Km*, and *kca*t/*Km* values within tables. If at least two of these parameters are present, the process proceeds; otherwise, the data is discarded. Steps 2 & 3: Locate the substrate name corresponding to the kinetic parameters, extracting only data for enzymes using CO2, methanol, formate, formaldehyde, or HCO3⁻ as substrates. The data is then standardized to reduce post-processing efforts. Step 4: Reviews previous steps to ensure complete data extraction.

Given the diversity of table structures, this basic workflow alone is insufficient. To enhance feature extraction, the prompt engineering process was refined by incorporating target specifications, requirements, examples, and key considerations, enabling adaptation to varied table formats. The extraction process was continuously optimized through manual validation of the dataset. The final optimized prompt engineering strategy consists of five modules (Supplementary Figs. 14c, d). To ensure data integrity, token limits of different models were considered, and input sizes were adjusted accordingly during extraction.

**Process 5: Integration of Feature Information.** All information extracted from the tables and text was organized by publication title, with data from the same study consolidated and matched to the corresponding enzymatic kinetic parameters and measurement conditions. The units of all features were standardized, and duplicate and outlier values were removed to construct a comprehensive intelligent extraction dataset. Finally, the intelligent extraction dataset was integrated with the manually curated dataset to form the final dataset, which was used for training the subsequent biological carbon sequestration efficiency evaluation model.

**Experimental verification of the evaluation model for the benefits of biological carbon sequestration**

**Acquisition and Purification of FLS Enzyme.** The FLS gene used in this study was synthesized by GenScript (Nanjing, China) and cloned into the pET28a(+) plasmid. Escherichia coli DH5α and BL21(DE3) (Sangon Biotech Co., Ltd., Shanghai, China) were used for plasmid cloning and protein expression, respectively. E. coli was cultured aerobically in Luria Bertani (LB) medium at 37℃, supplemented with kanamycin (50 µg/mL) as required. The plasmid was transformed into competent cells, which were cultured overnight and single colonies were picked for inoculation into 400 mL of LB medium containing 1‰ kanamycin in a 2-liter shaking flask. The culture was grown at 37℃, 220 rpm until OD600 reached 0.6, then 0.6 mM IPTG was added for induction at 16℃ overnight. After induction, cells were harvested by centrifugation at 4℃, 4000 rpm for 10 minutes.

The cell pellet was resuspended in 20 mL of Binding Buffer (500 mM NaCl, 30 mM imidazole, 20 mM NaH2PO4, pH 7.4). The cells were lysed using an ultrasonic cell disruptor, and the lysate was centrifuged at 10,000 rpm, 4℃ for 1 hour to collect the crude enzyme solution. The crude enzyme solution was mixed with pre-treated HisSep Ni-NTA Agarose Resin in a 50 mL centrifuge tube and rotated on a rotary mixer for 1 hour. The mixture was loaded onto a purification column, and after the buffer had passed through, the column was washed with 15 mL of Wash Buffer (500 mM NaCl, 100 mM imidazole, 20 mM NaH2PO4, pH 7.4) to remove residual impurities. Elution was performed with 5 mL of Elution Buffer (500 mM NaCl, 500 mM imidazole, 20 mM NaH2PO4, pH 7.4). The eluted fraction was transferred into an ultrafiltration tube and centrifuged at 4000 rpm for 1 hour at 4℃. The filtrate was discarded, and the enzyme was resuspended in 5 mL of Reaction Buffer 1 (50 mM Tris-HCl, 5 mM MgCl2, pH8.0) and centrifuged again under the same conditions. This washing procedure was repeated three times to obtain the purified FLS enzyme.

**Site-Directed Mutagenesis of FLS Enzyme**. Using the FLS gene as a template (Supplementary Table 12), the corresponding amino acid residues at target positions were substituted with desired amino acids, and primers were designed as shown in Supplementary Table 13. Site-directed mutagenesis was performed via PCR, with a 20 μL reaction mixture consisting of: PrimeStar (10 μL), FLS template DNA (0.5 μL), forward primer (1 μL), reverse primer (1 μL), and sterilized ddH2O (7.5 μL).

The PCR amplification program was as follows: 98℃ for 3 minutes for pre-denaturation, followed by 98℃ for 30 seconds for denaturation, 55℃ for 1 minute for annealing, 72℃ for 2 minutes 30 seconds for extension, and a final hold at 4℃. To digest the parental template, 0.5 μL of Dpn I restriction enzyme (10 U/μL) was added to each amplification reaction and incubated at 37℃ for 1 hour. The digestion products containing the FLS enzyme mutant were then transformed into *E. coli* BL21(DE3) competent cells and cultured at 37℃ for 12-16 hours. Colonies from different mutant transformants were then selected for further analysis.

**Detection of Dihydroxyacetone (DHA) by HPLC.** After 1 hour of reaction under different conditions and with different mutant enzymes, the reaction mixture was derivatized with dinitrophenylhydrazine (DNPH) at 60℃ for 1 hour to obtain the DNPH derivative of the DHA product. The amount of DHA derivative was quantified using HPLC. The HPLC system consisted of a Shimadzu high-performance liquid chromatography instrument equipped with a UV detector, a C18 column (Thermo, 5 μm, 4.6 × 250 mm), maintained at 35℃, with a flow rate of 0.8 mL/min. The mobile phases A and B were water and acetonitrile, respectively, in a volume ratio of 3:7.

**Performance analysis of FLS enzyme site directed mutagenesis.** The crystal structure of FLS was obtained from the PDB database (PDB ID: 4QQ8) and modeled using SWISS-MODEL (https://swissmodel.expasy.org/). Based on the FLS model structure, PyMOL was used to remove redundant subunits, ligands, and metal ions. AutoDock 4.0 was then employed to preprocess the protein and the DHA molecule by removing water molecules and adding hydrogen atoms, while retaining the TPP cofactor in the docking system. Hydrogen atoms were added to both the protein and ligand, and Gasteiger charges were calculated, defining the protein as the receptor and DHA as the ligand. A semi-flexible docking approach in AutoDock 4.0 was applied, with the C2 atom of TPP set as the docking center to position DHA near the active site of each protein. The docking simulation was conducted using the Lamarckian genetic algorithm. Each mutant was generated using PyMOL, with the wild-type FLS model serving as the template. The docking results were analyzed using PyMOL.

**Supplemental Figures and Tables**

**
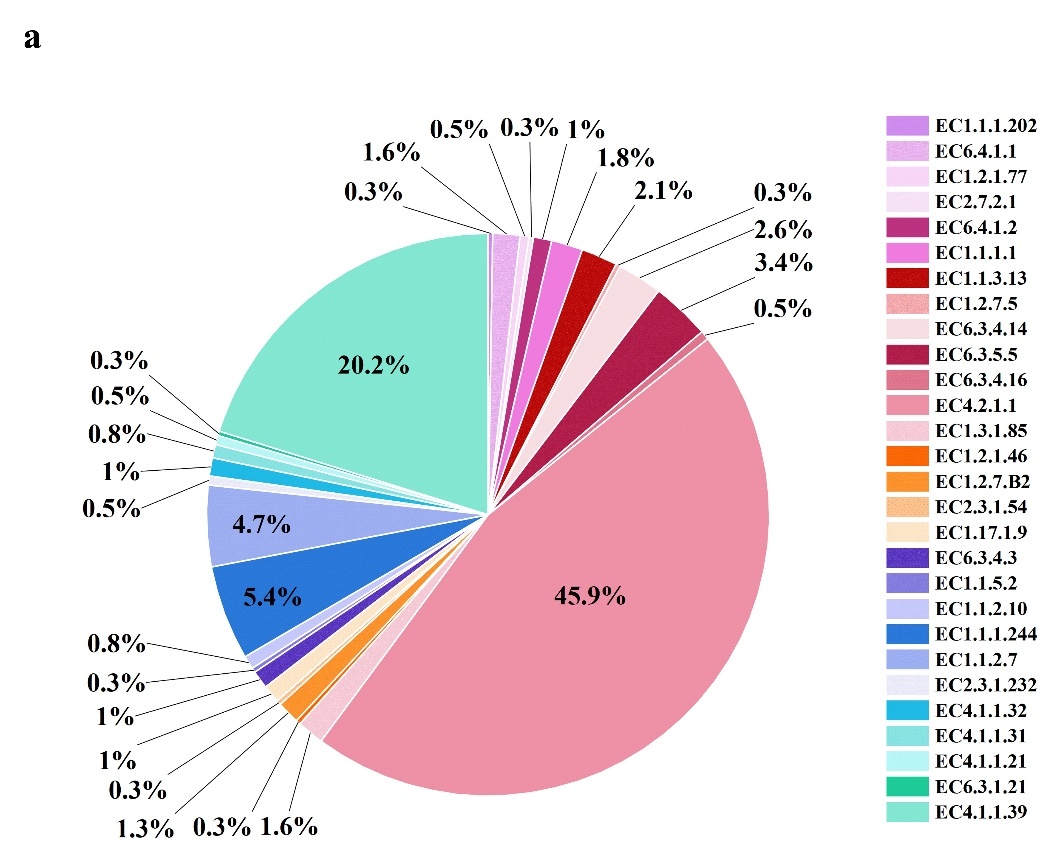
**

**
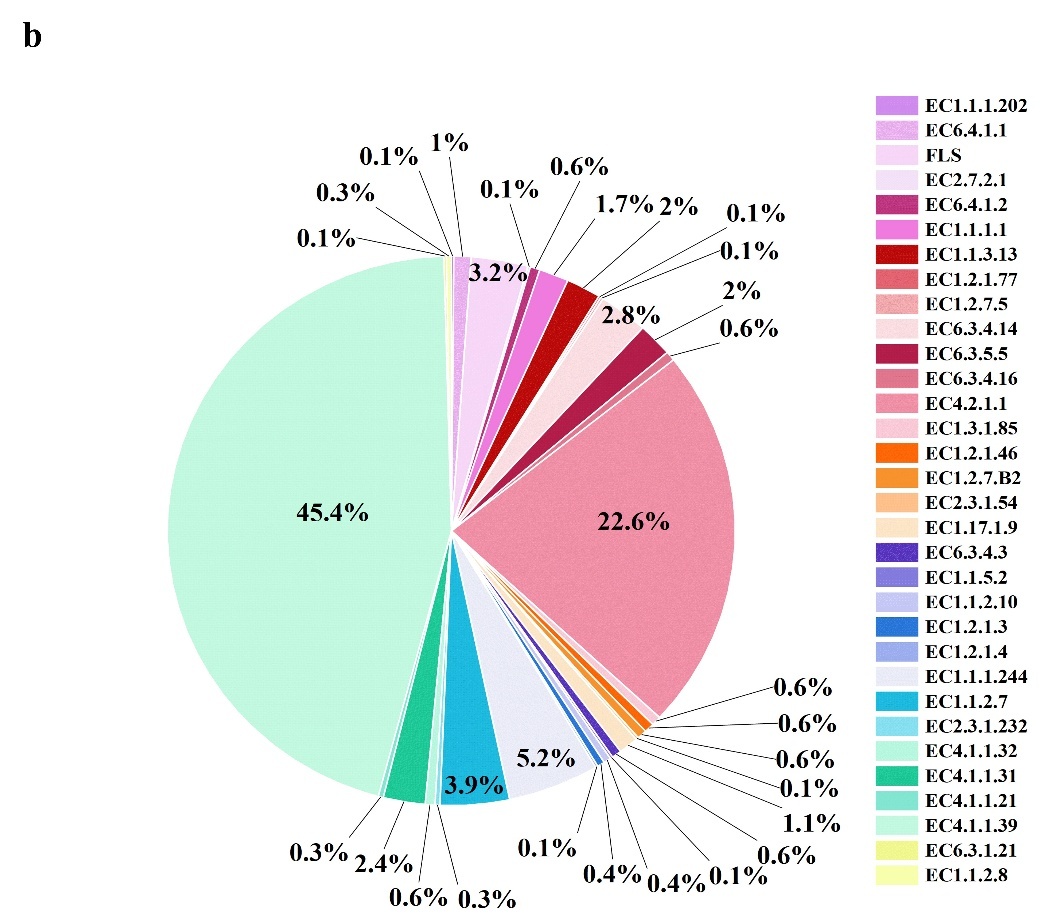
**

**
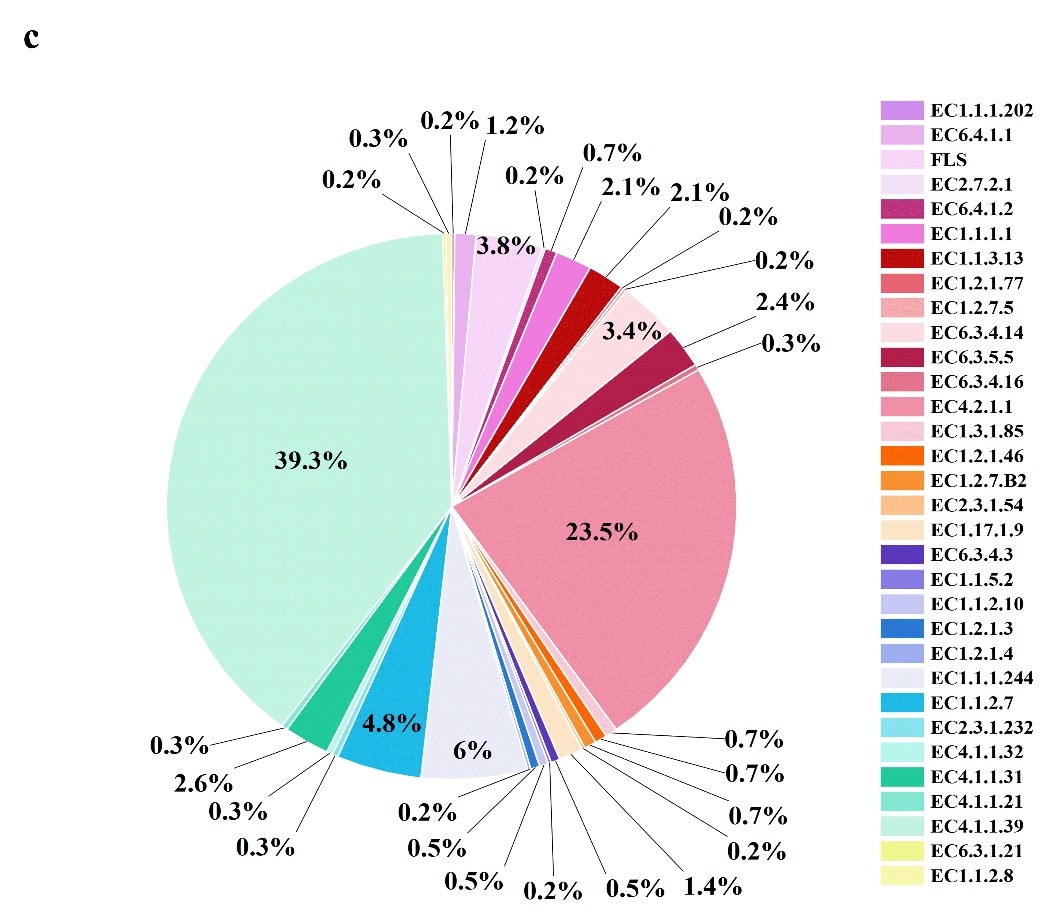
**

**Supplementary Figure 1.** EC enzyme distribution for extracting data after several rounds of data preprocessing, cleaning and combination. **a)** The manually extracting dataset. **b)** The reaction condition level dataset. **c**) The protein level dataset.


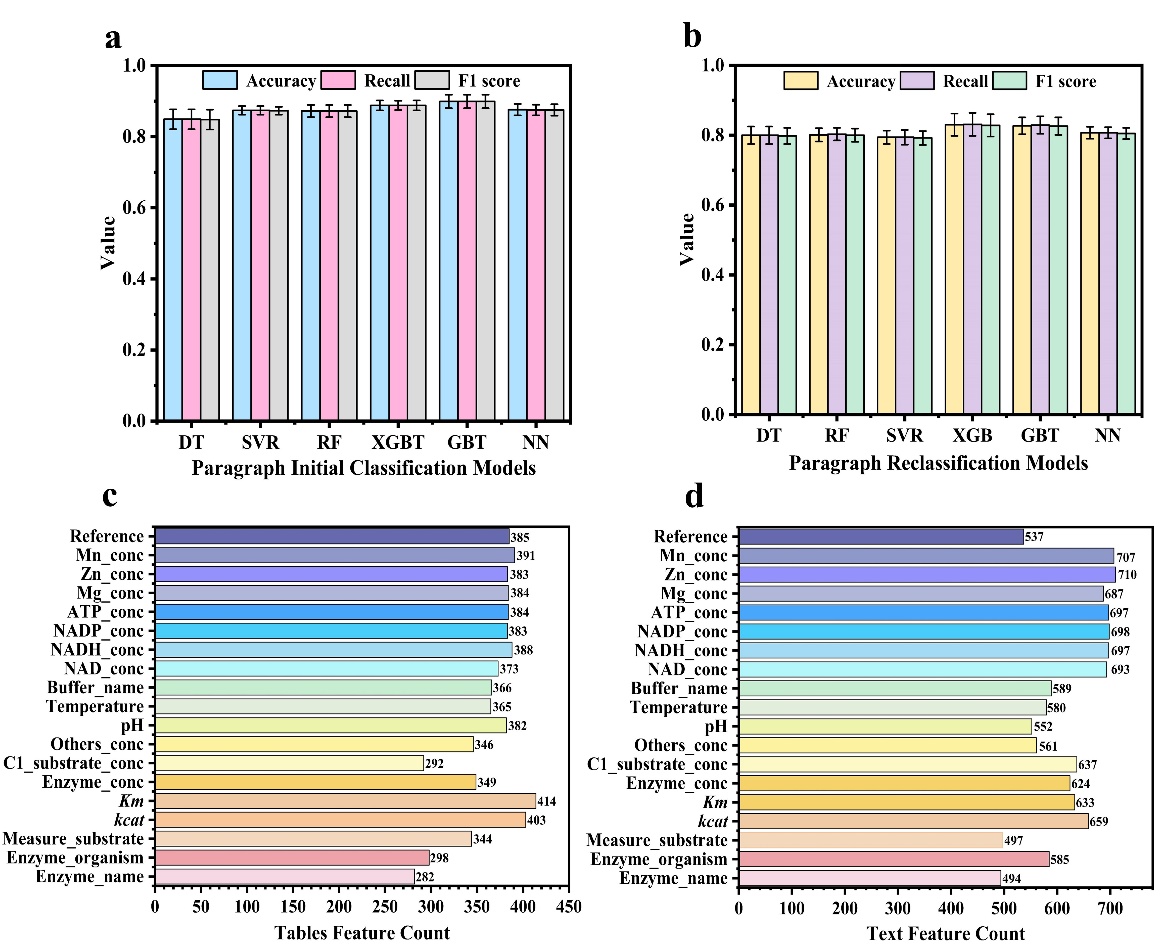

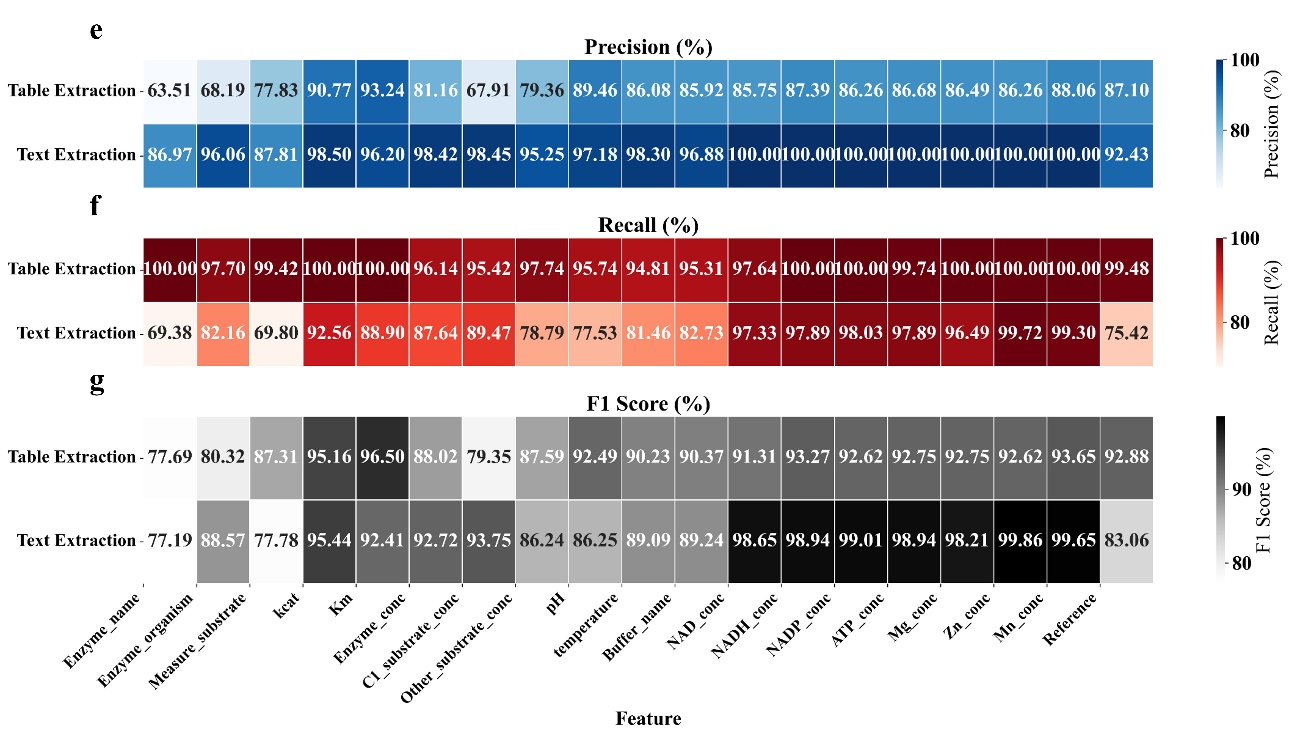


**Supplementary Figure 2.** Multi aspect performance analysis of intelligent data mining process. **a**) The performance of the initial paragraph classification model. **b**) The performance of paragraph reclassification model. **c**) The count distribution of correctly extracted features for each of the 19 feature parameters in the intelligent table data extraction process. **d**) The count distribution of correctly extracted features for each of the 19 feature parameters in the intelligent text data extraction process. **e**, **f**, **g**) The heatmap illustrates the detailed percentage accuracy, recall, and F1 score of each synthesized parameter in the intelligent data process from tables and text.


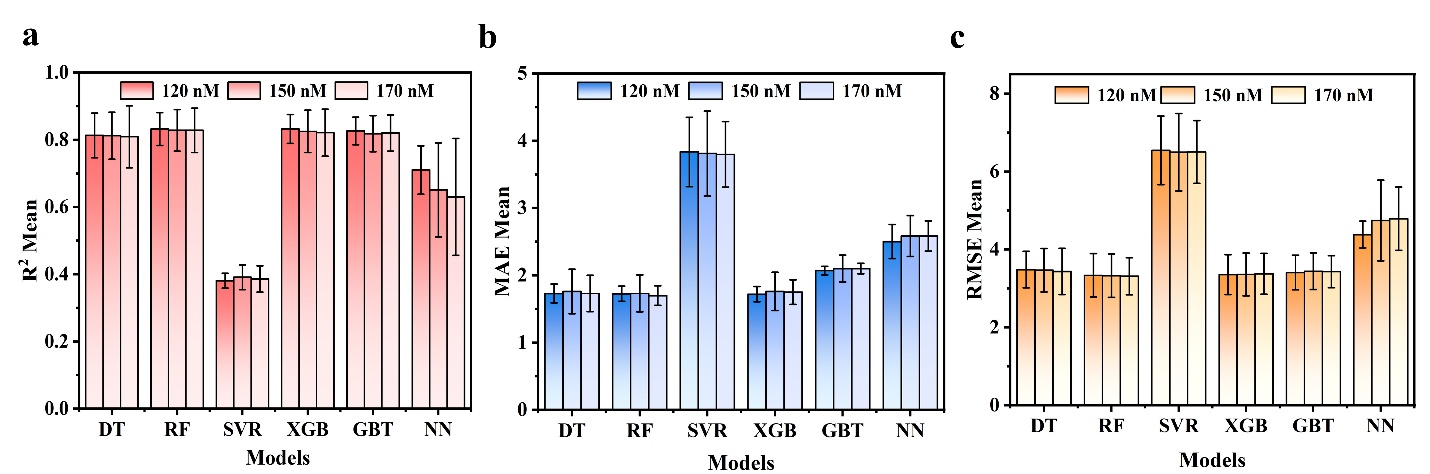


**Supplementary Figure 3. Performance of Six Models at Enzyme Concentration of 120, 150, 170 nM. a)** R2 mean**. b)** MAE mean**. c)** RMSE mean**.**


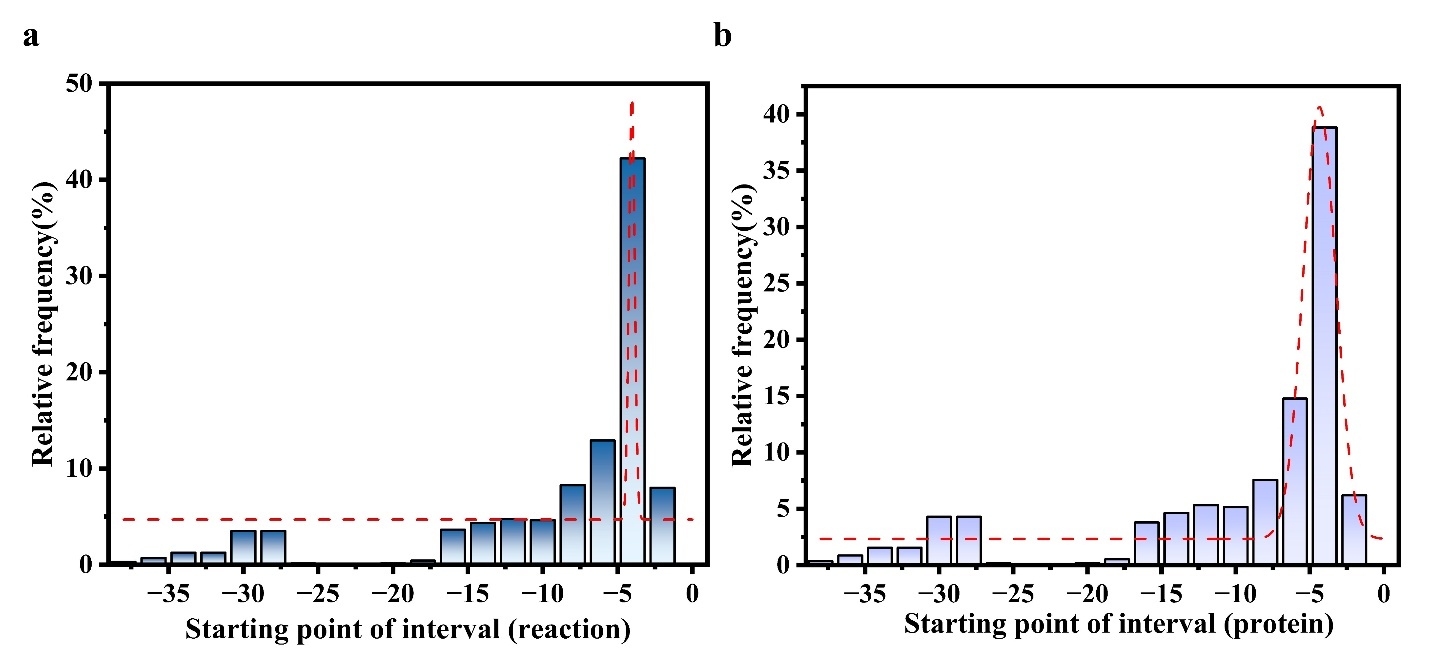


**Supplementary Figure 4. Frequency distribution plot of label ln (EIRCBFA) values in the datasets. a**) The reaction conditions level dataset. **b**) The protein level dataset.

**
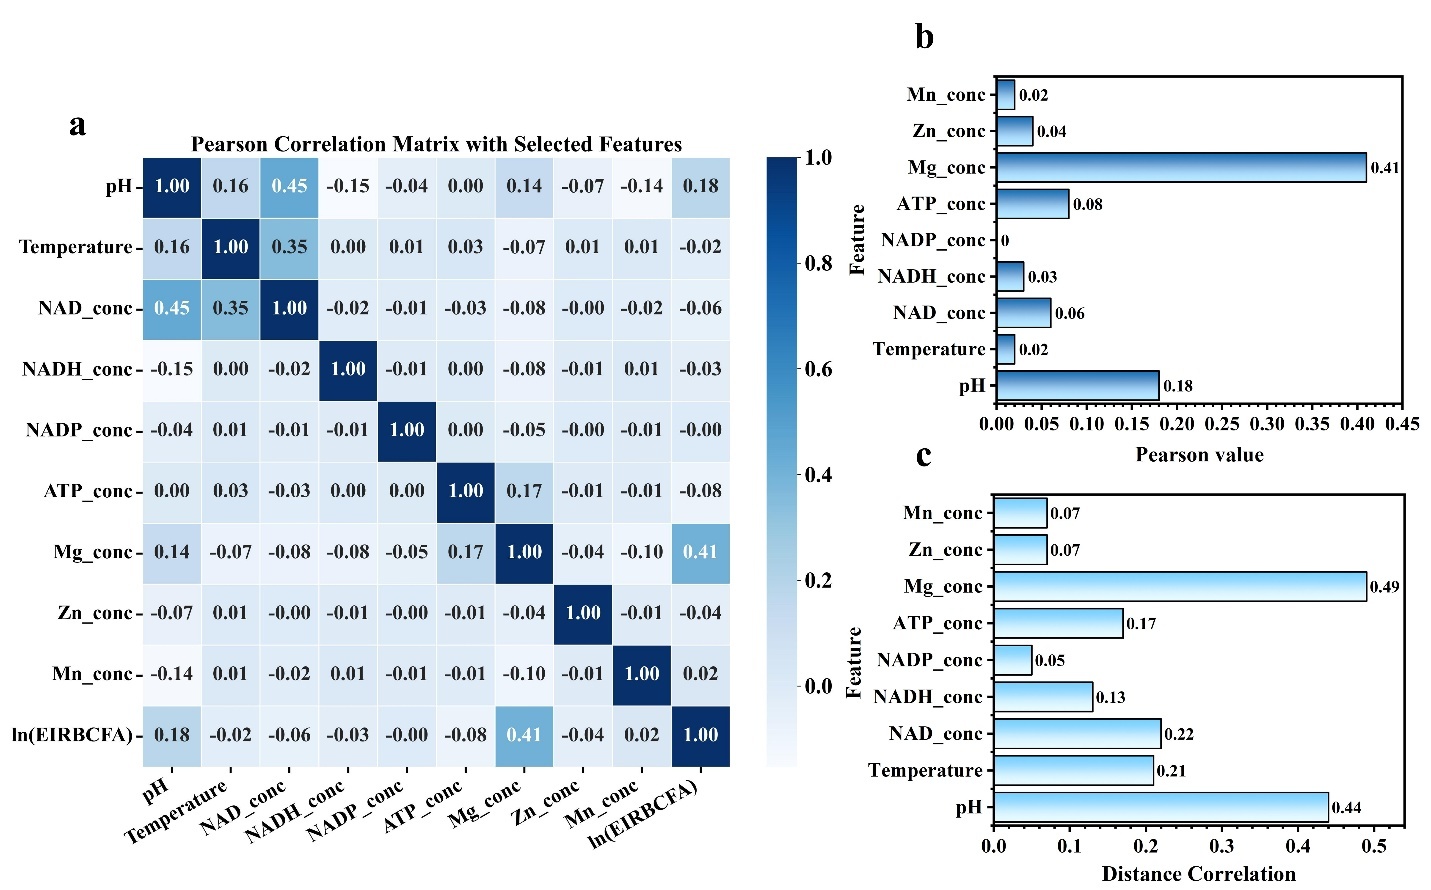
**

**Supplementary Figure 5. Importance analysis of numerical features.** **a)** Pearson analysis heatmap. **b)** Pearson correlation distribution chart. **c)** Distance correlation distribution map.

**
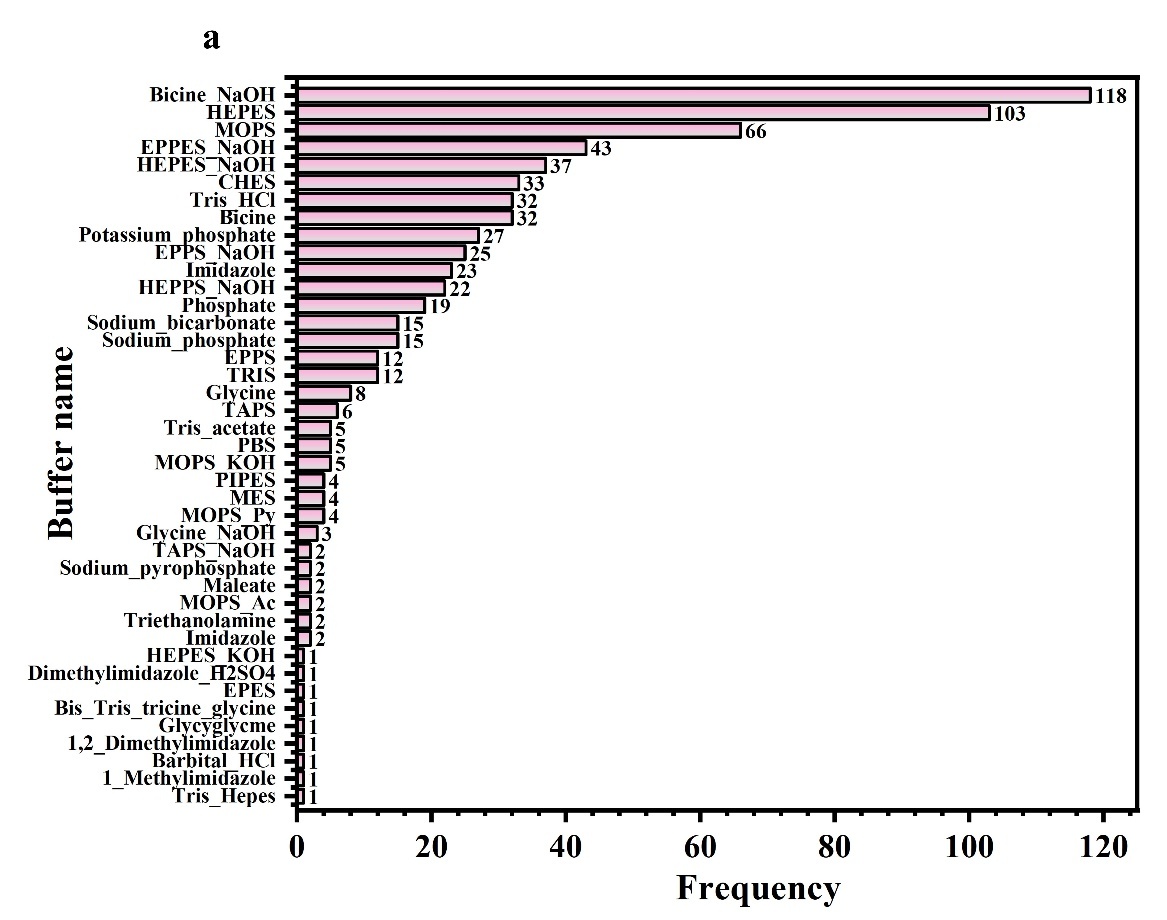
**

**
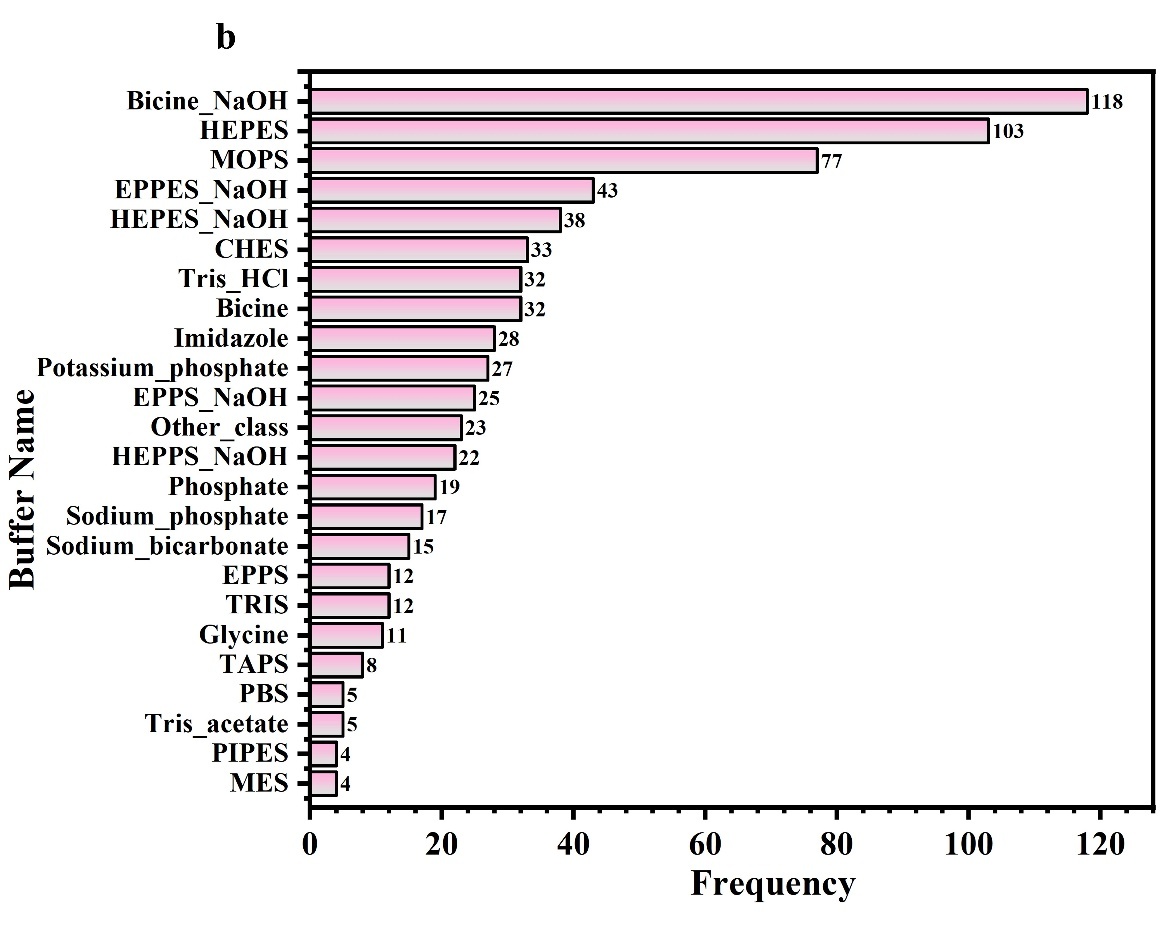
**

**Supplementary Figure 6. Characteristic distribution map of “Buffer_name”. a**) Before feature optimization. **b**) After feature optimization.


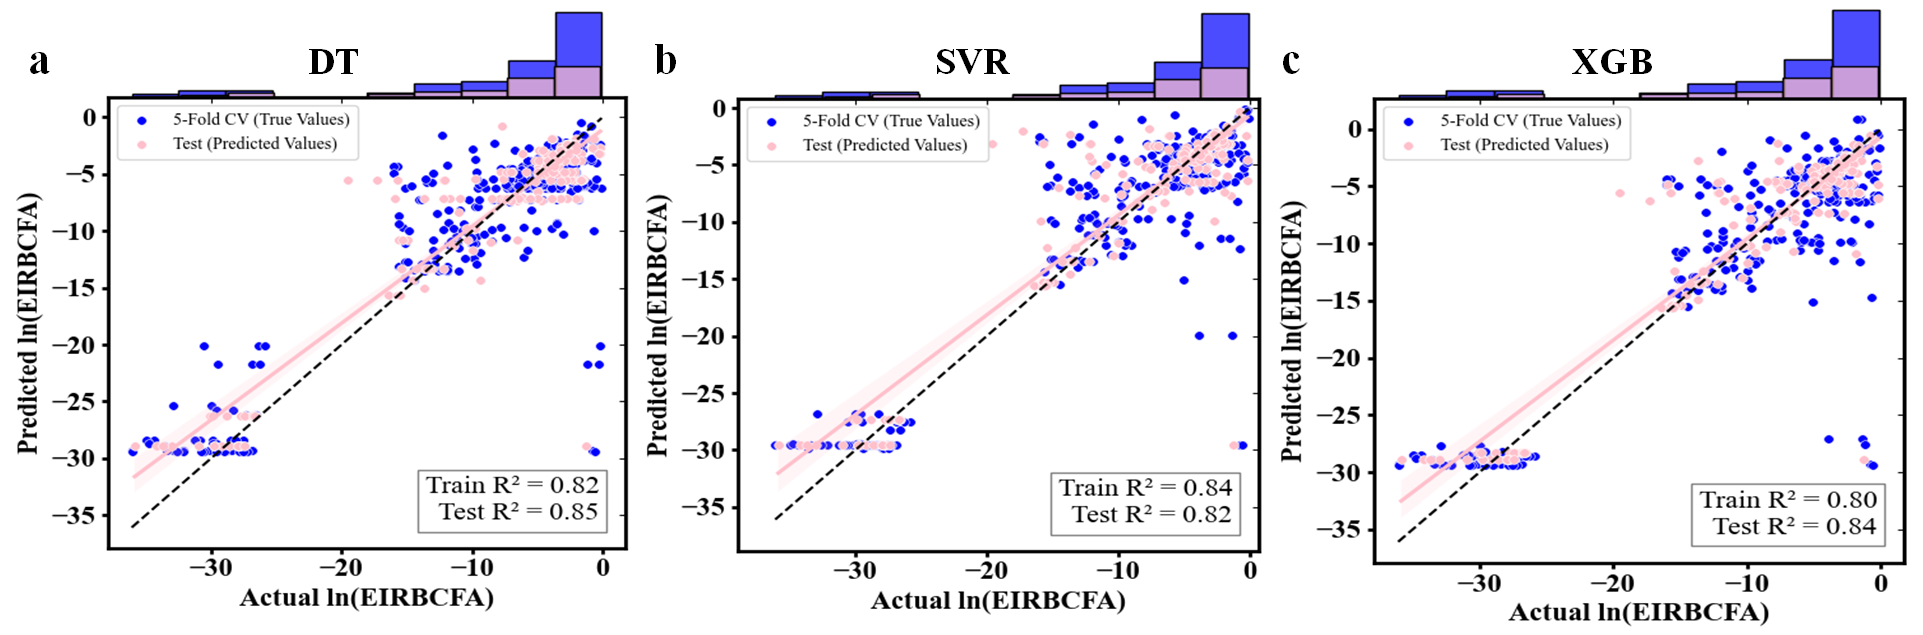


**Supplementary Figure 7. Model prediction on reaction conditions. a**) DT, **b**) SVR, **c**) XGB on the master data set. The fivefold CV method employed for all the models resulted in the development of generalized models as the R2 on the fivefold CV set and the test data set closely matched each other. The pink shades represent 95% confidence intervals of the regression line on the test points. The black dashed lines represent the line of equality (y = x).


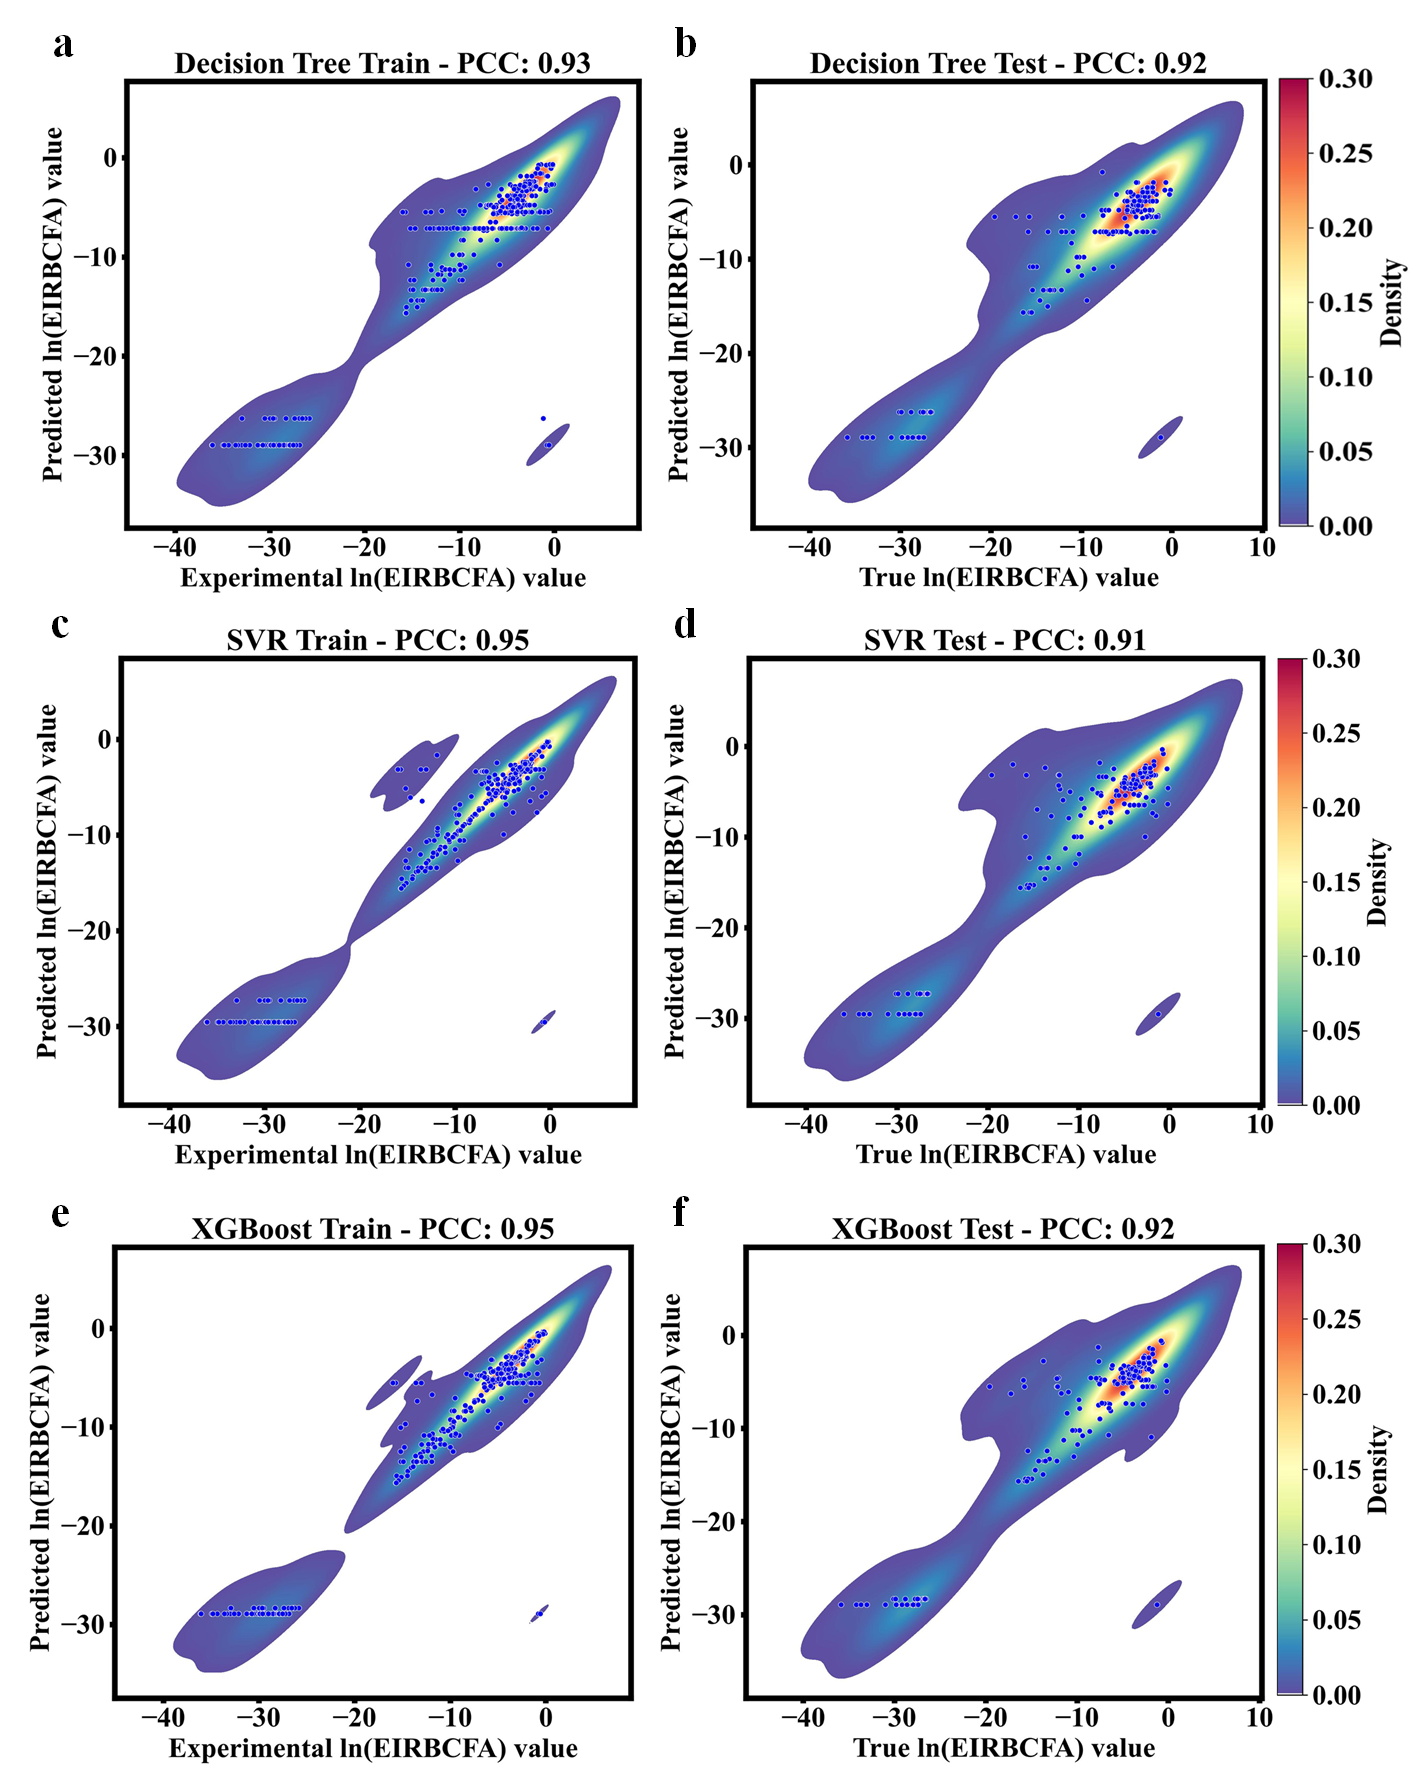


**Supplementary Figure 8. PCC analysis of different models on training and testing sets for reaction conditions level. a**) DT model in the training set. **b**) DT model in the testing set. **c**) SVR model in the training set. **d**) SVR model in the testing set. **e**) XGB model in the training set. **f**) XGB model in the testing set.


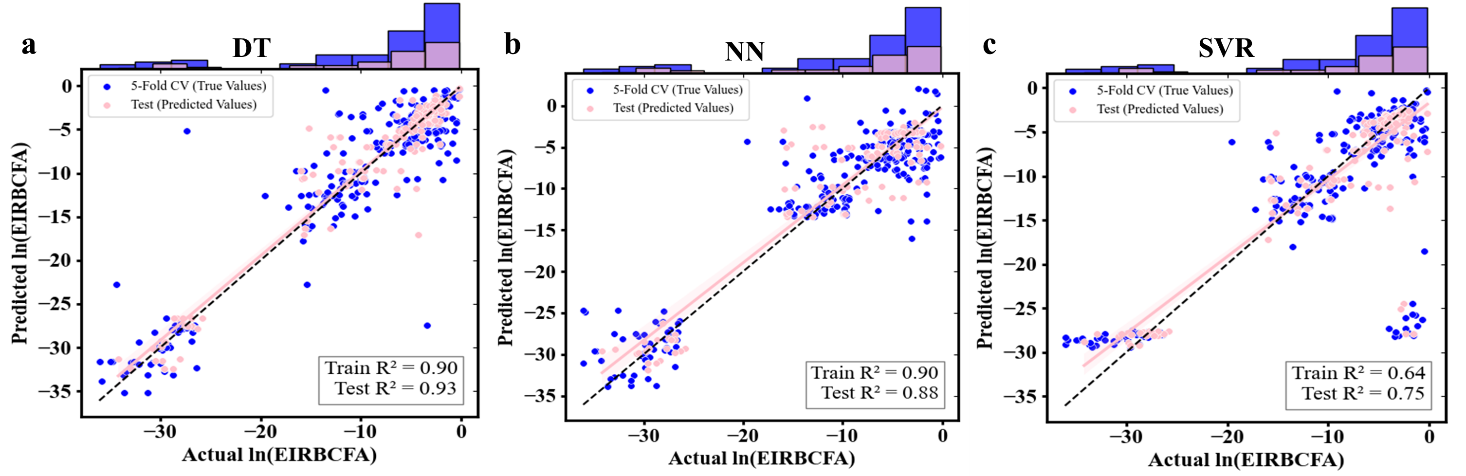


**Supplementary Figure 9. Model prediction on protein level.** **a**) DT, **b**) NN, **c**) SVR on the master data set. The fivefold CV method employed for all the models resulted in the development of generalized models as the R2 on the fivefold CV set and the test data set closely matched each other. The pink shades represent 95% confidence intervals of the regression line on the test points. The black dashed lines represent the line of equality (y = x).


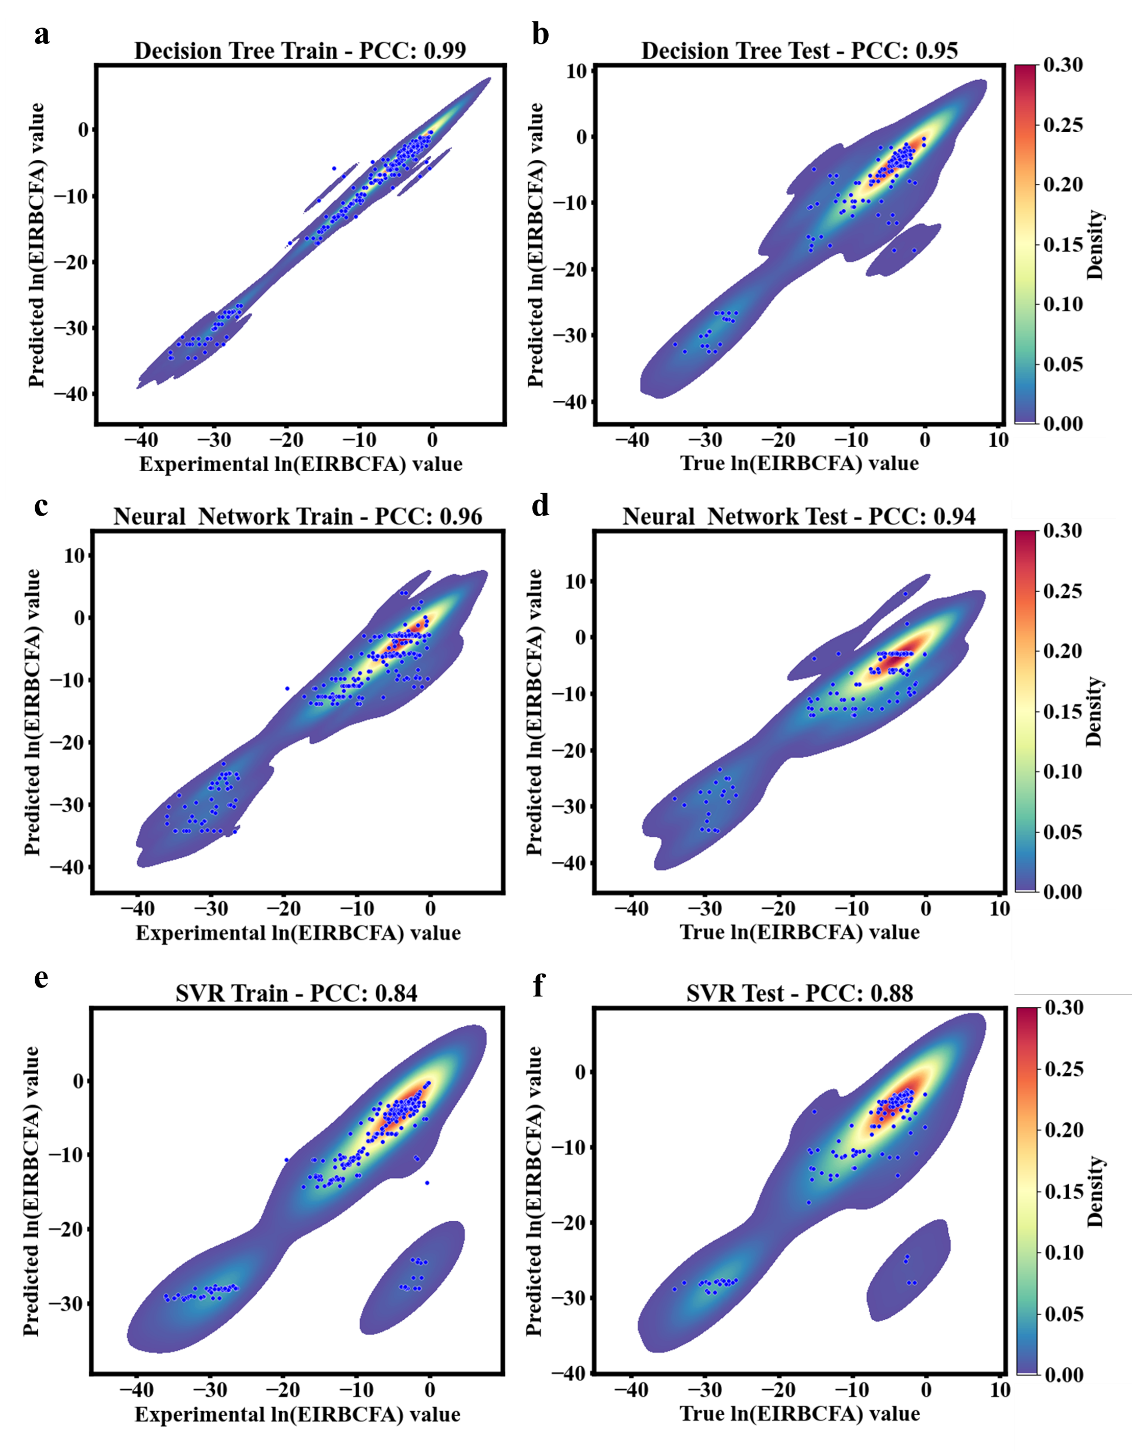


**Supplementary Figure 10. PCC analysis of different models on training and testing sets for protein level. a**) DT model in the training set. **b**) DT model in the testing set. **c**) NN model in the training set. **d**) NN model in the testing set. **e**) SVR model in the training set. **f**) SVR model in the testing Set.


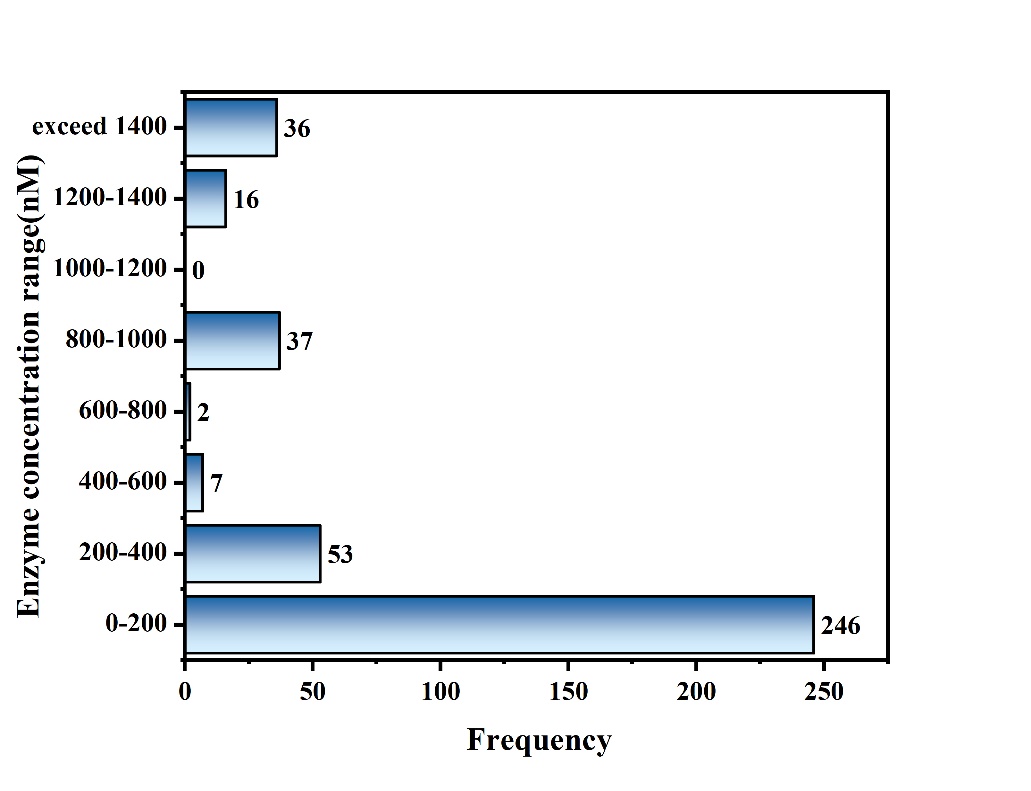


**Supplementary Figure 11. Frequency distribution chart of enzyme concentration interval.** The figure includes the frequency statistics of all enzyme concentrations that have been clearly given in the dataset.


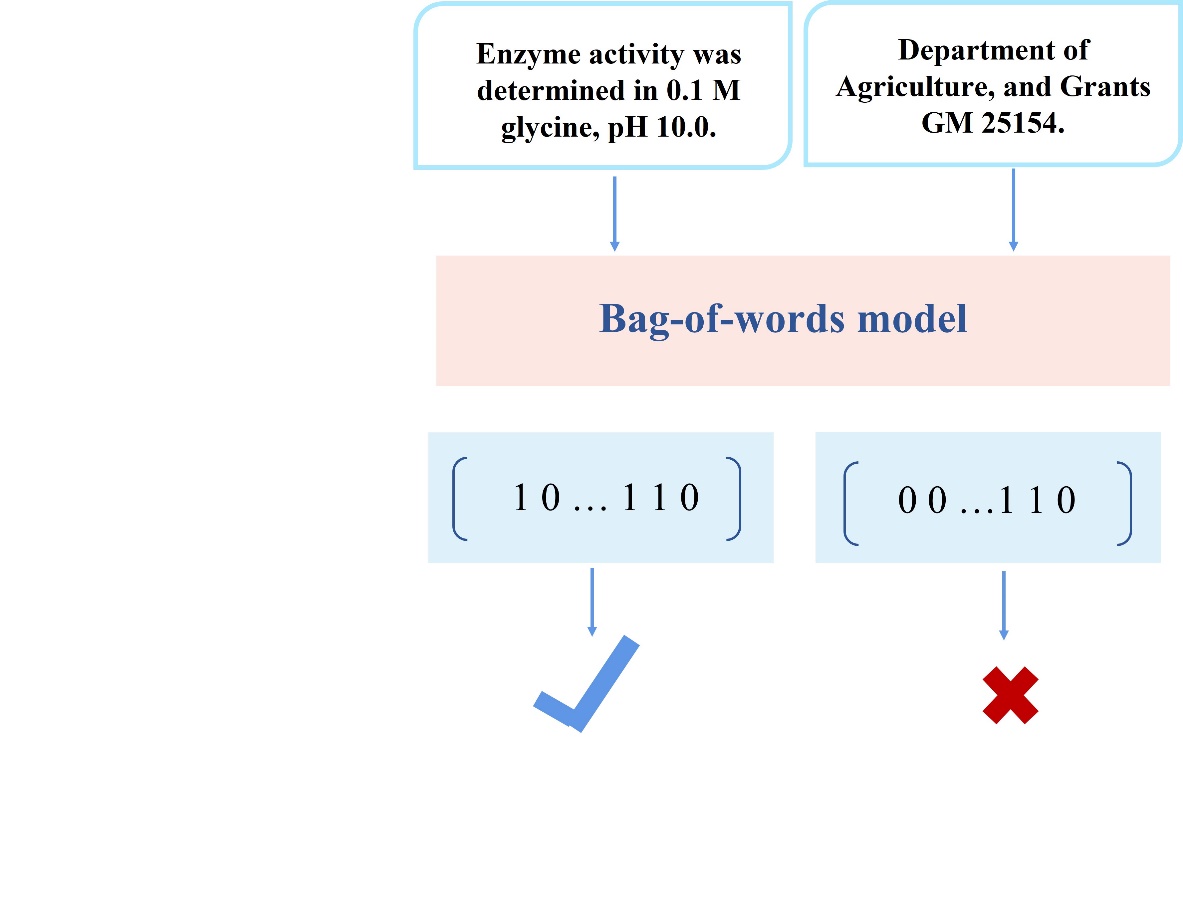


**Supplementary Figure 12. Paragraph classification model.** The model converts text into numerical vectors through a pocket model, and then manually defines classification labels as a dataset for machine learning models to learn and classify.


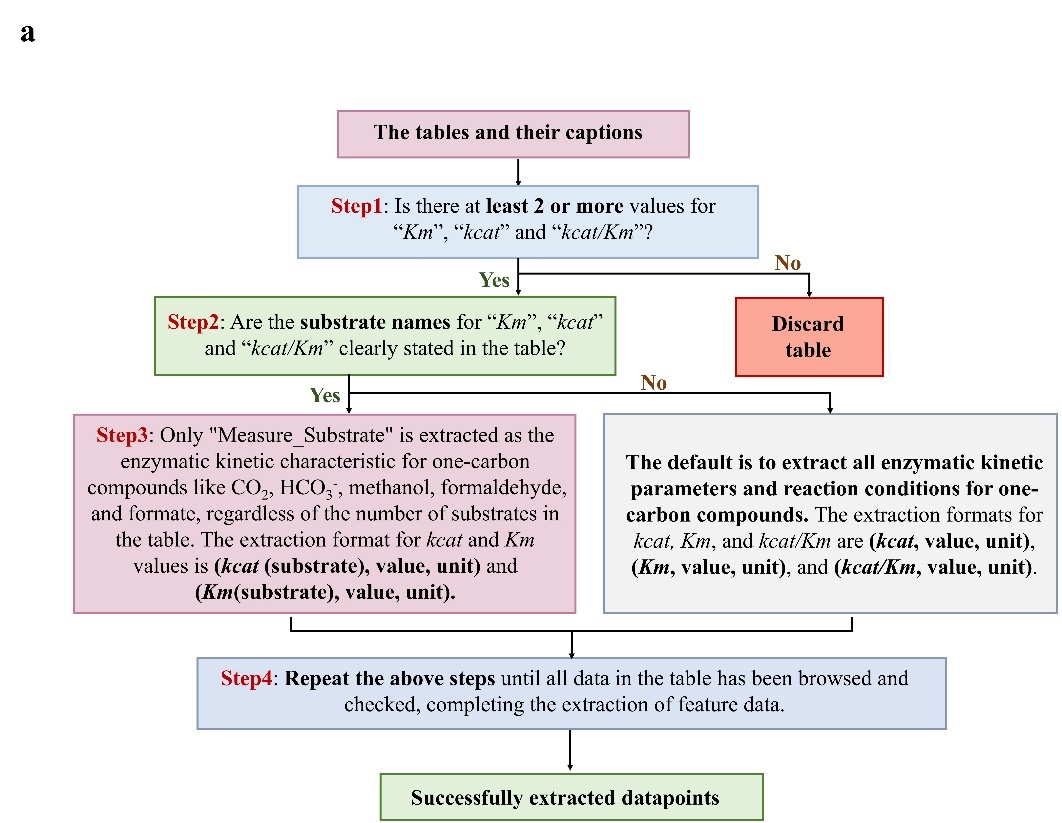


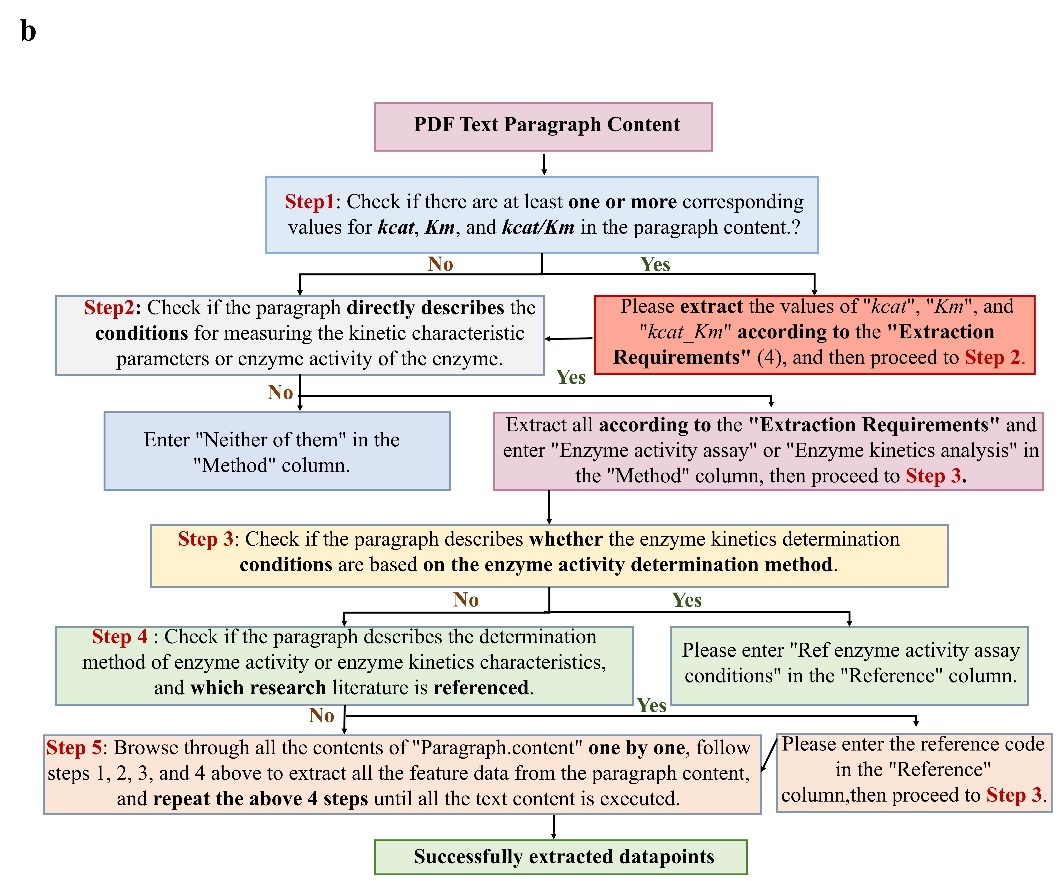


**Supplementary Figure 13. A flowchart describing our enzyme kinetics feature extraction process from tables and texts using a conversational large language model.** Panel **a**) contains a flowchart for extracting data from tables while pane. Panel **b**) contains a flowchart for extracting data from texts while pane.


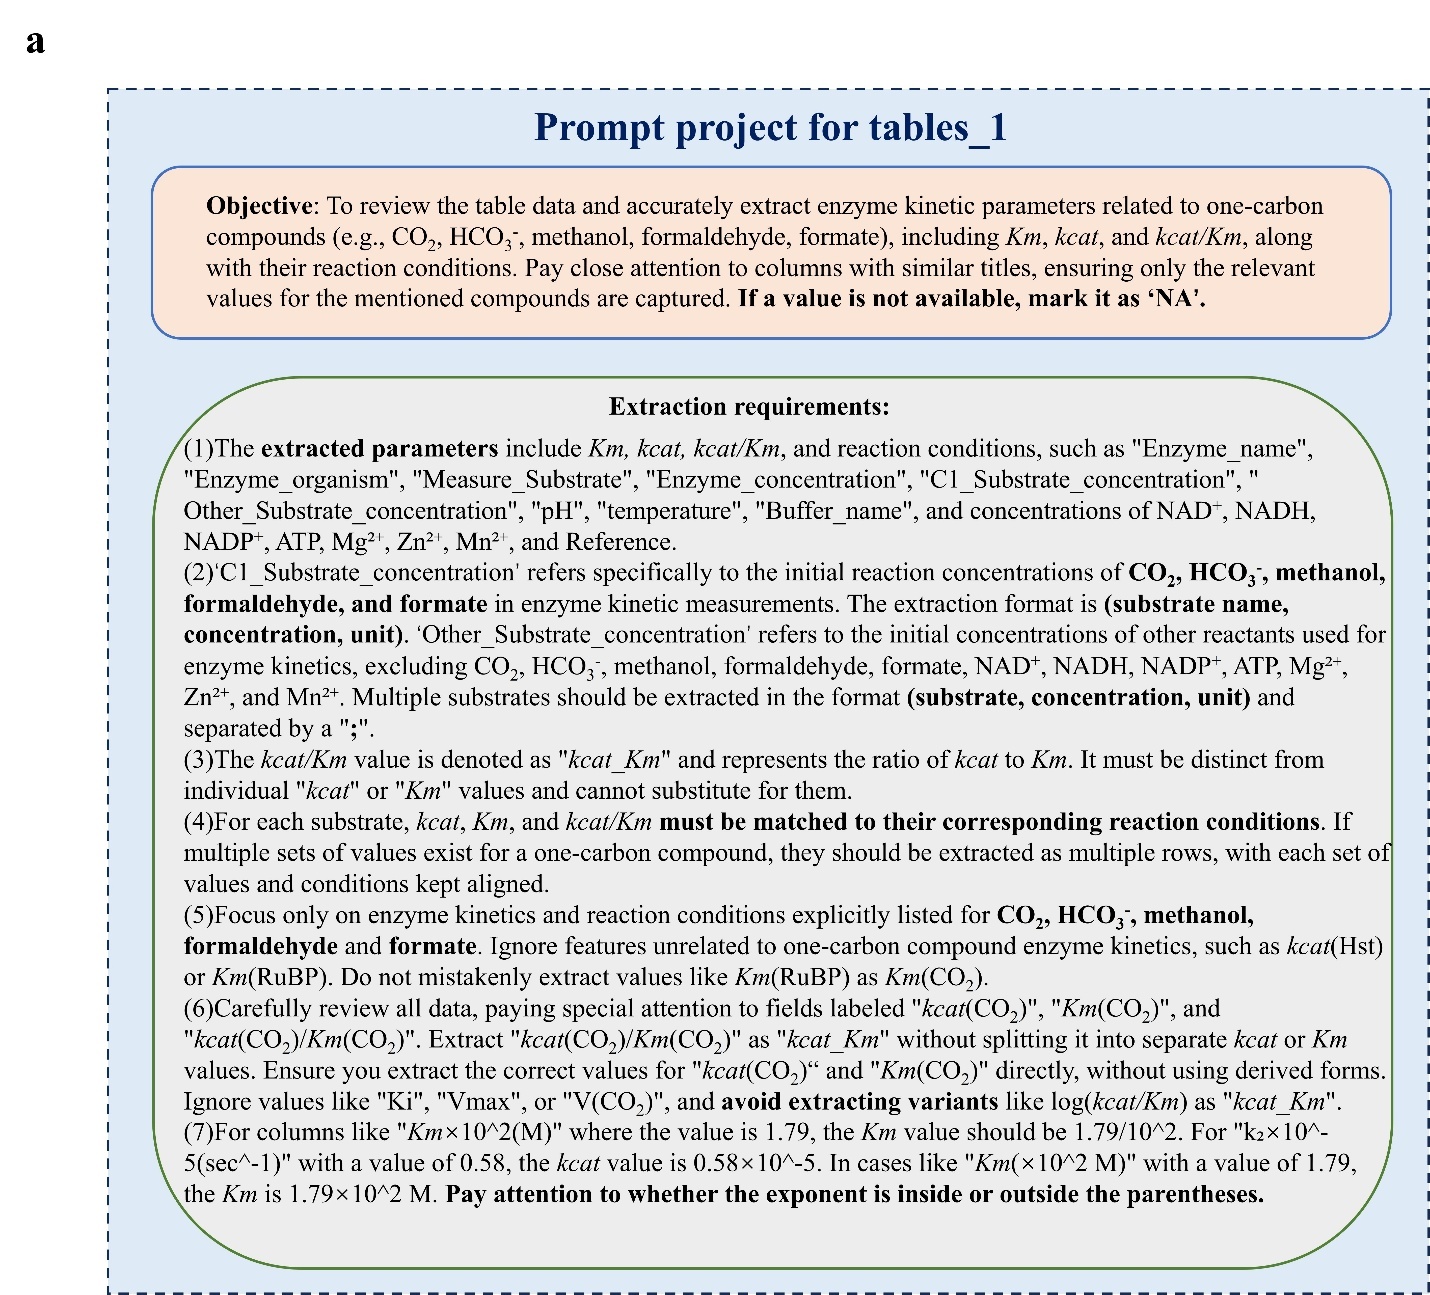


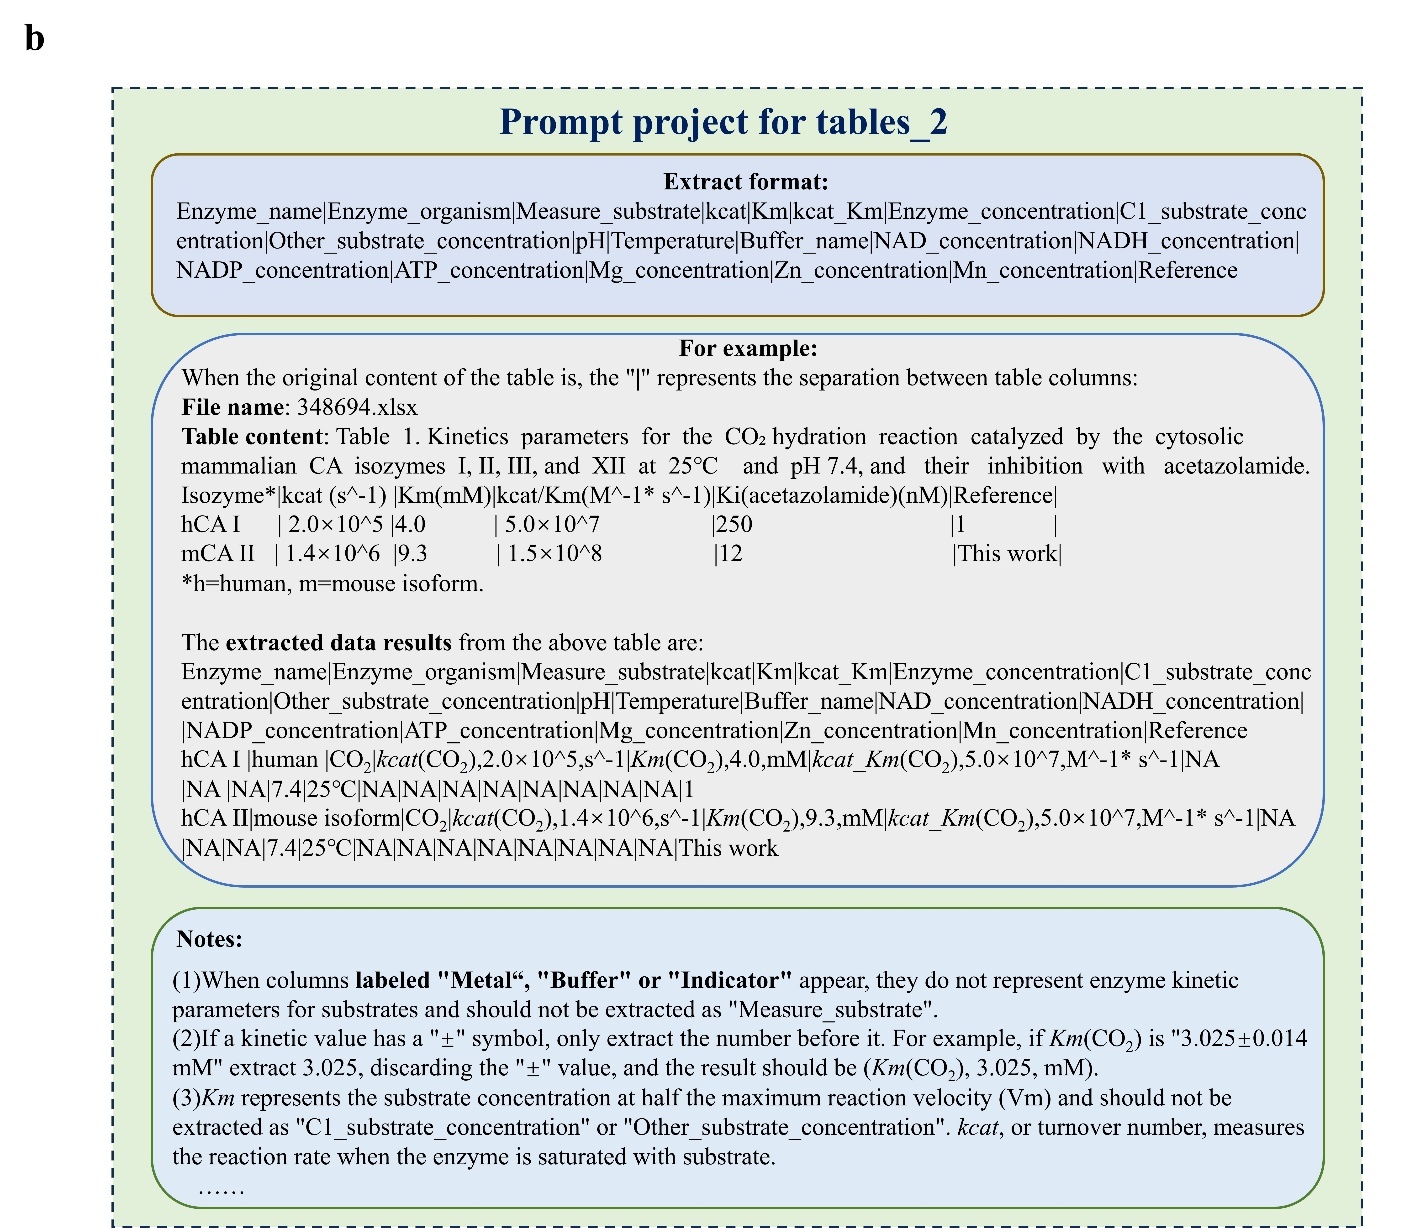


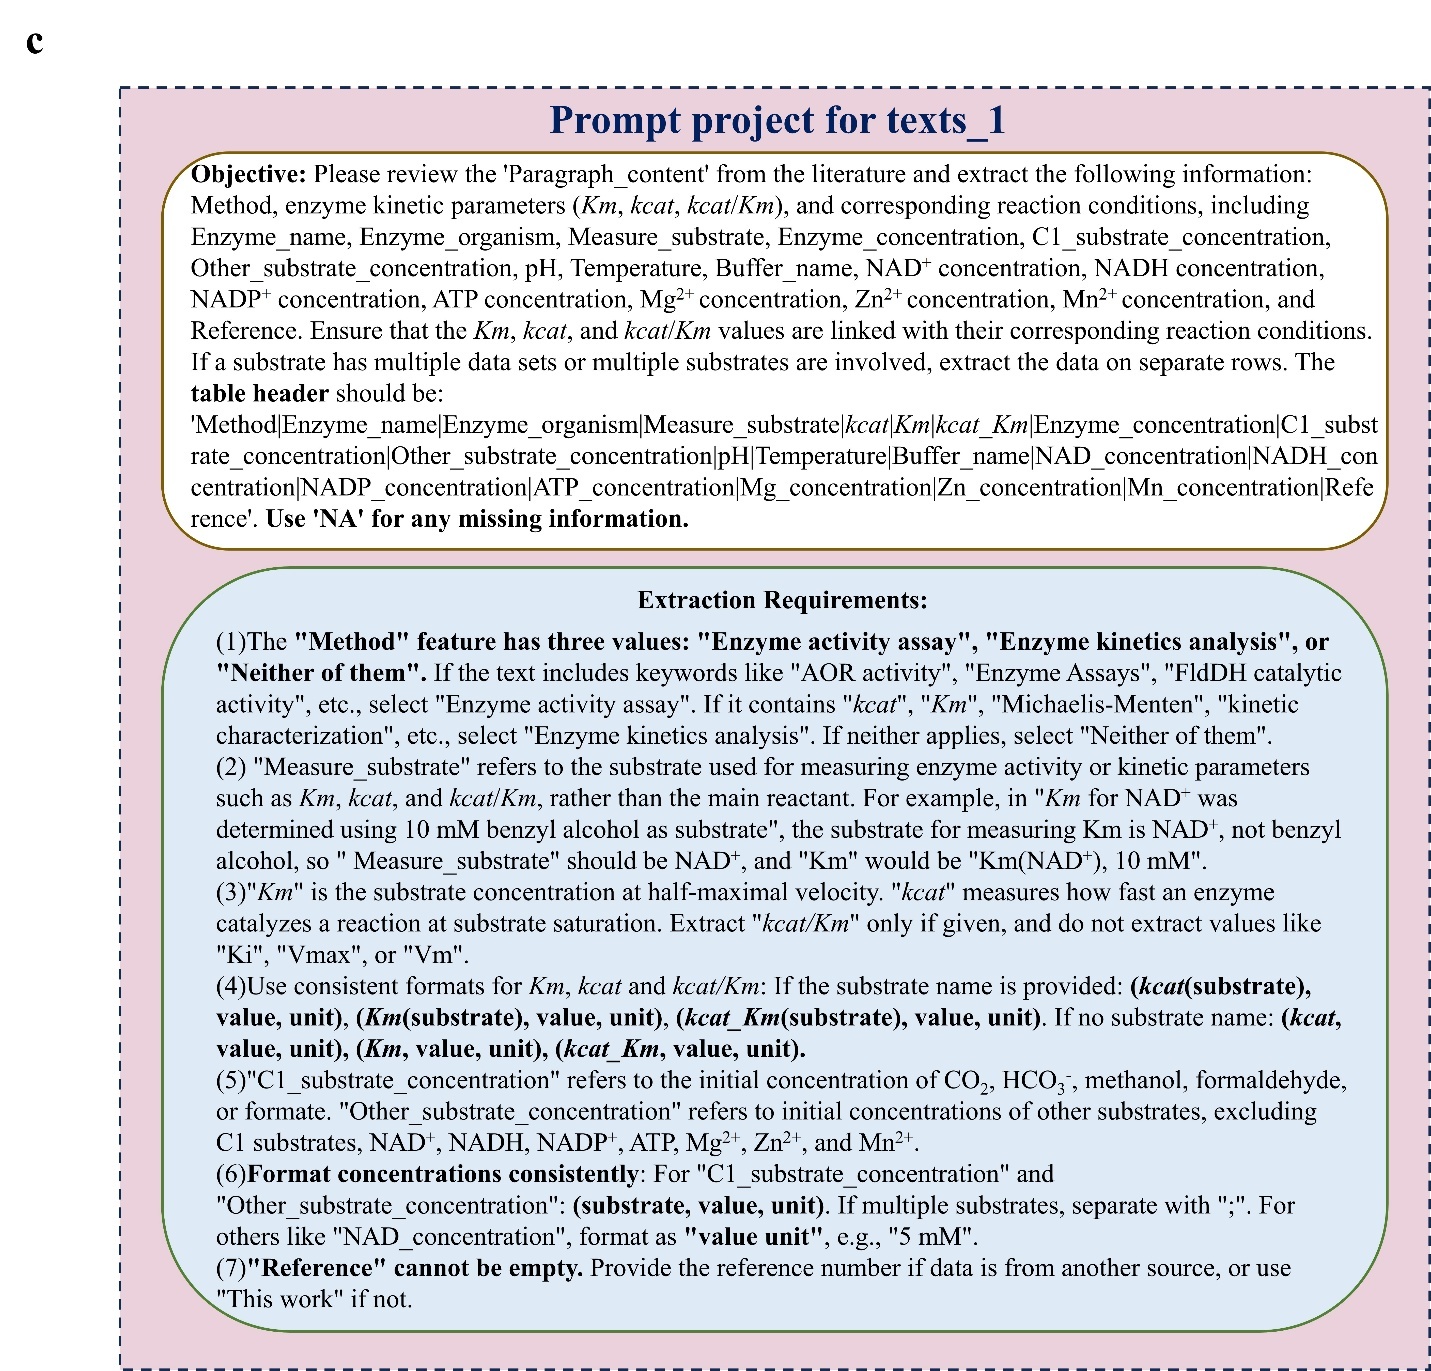


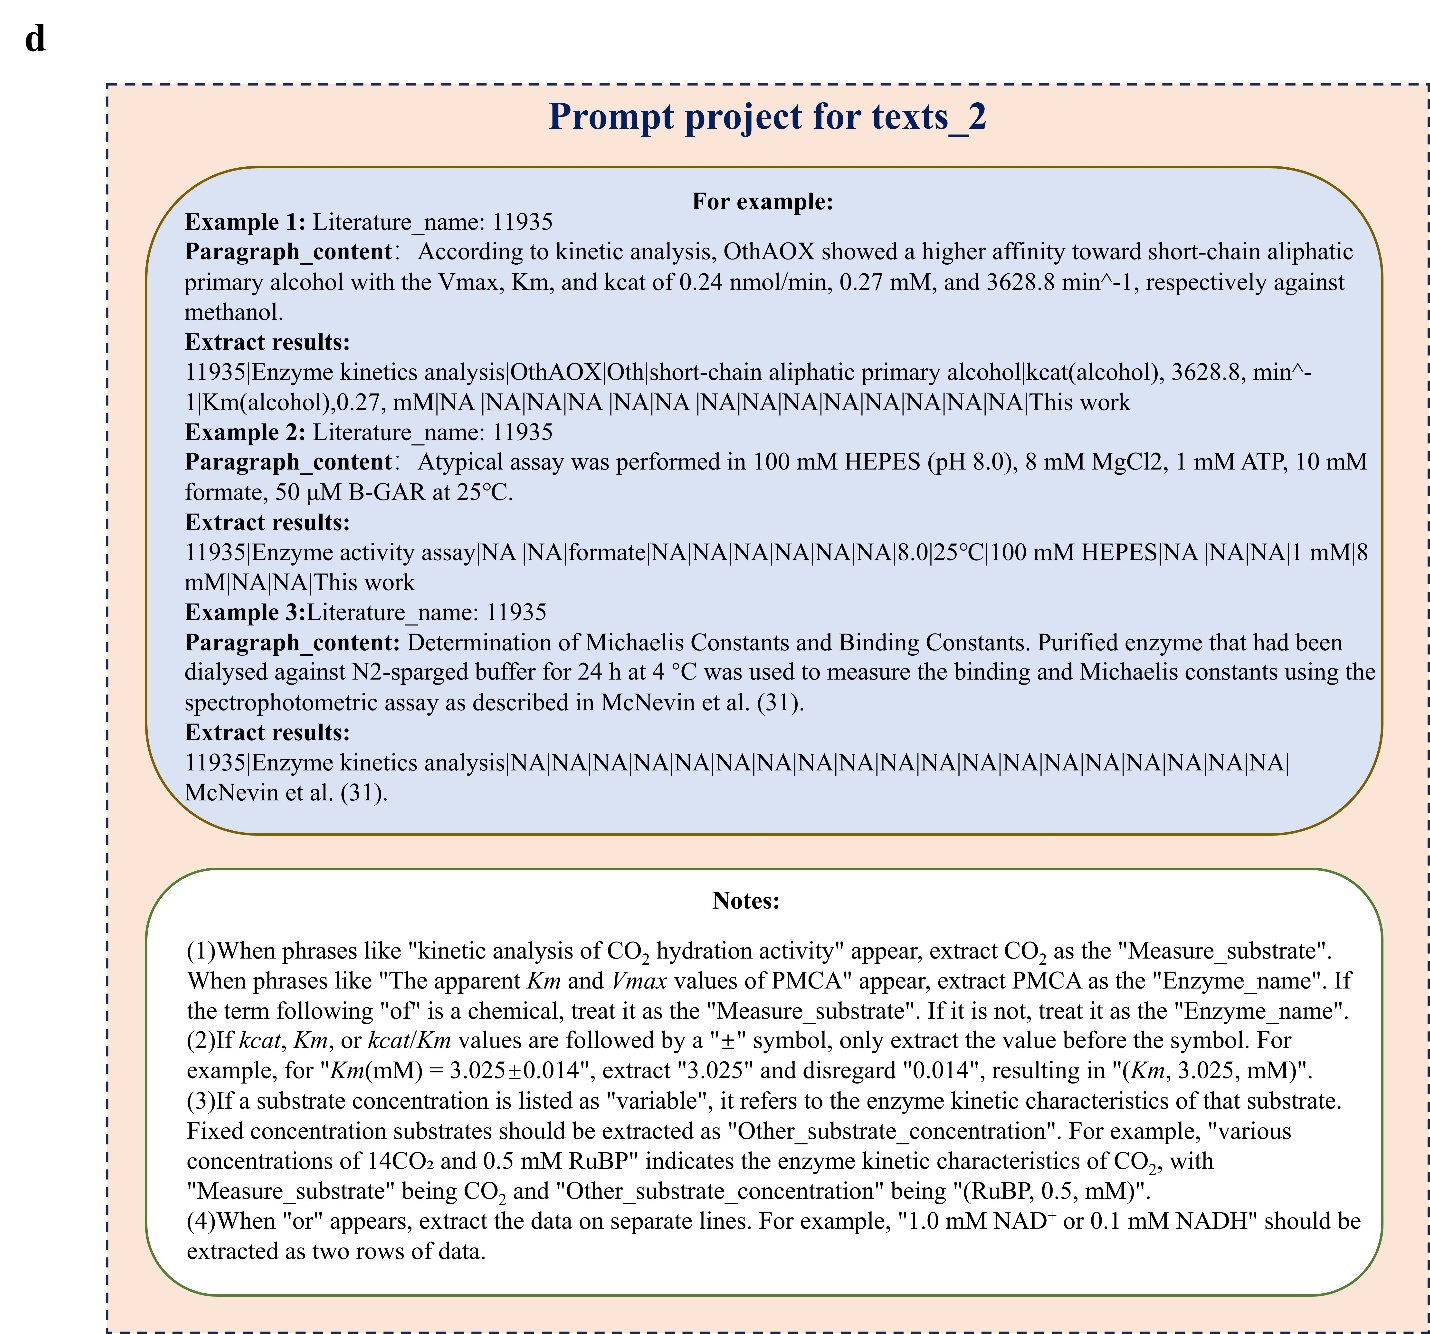


**Supplementary Figure 14. The tip project for extracting feature data from tables and texts.** **a**, **b**) for tables, **c**, **d**) for texts**. a)** Objective and extraction requirements. **b)** Extract format and examples, notes. **c**) Objective and extraction requirements. **d**) Examples and notes.

**Supplementary Table 1. All feature parameters extracted in this study and their explanations.**

| **Number** | | **Feature** | **Explanation** | **Unit** |
| --- | --- | --- | --- | --- |
| 1 | Enzyme_name | | The enzyme kinetic parameters measured correspond to the name of the enzyme. | NA |
| 2 | Enzyme_organism | | The organism source of enzymes. | NA |
| 3 | Measure_substrate | | Corresponding substrates for enzyme kinetics parameter determination. | NA |
| 4 | *kcat* | | Catalytic constant, also known as conversion number, refers to the rate constant at which a substrate is converted into a product within the active site of a catalyst | s-1 |
| 5 | *Km* | | The concentration of substrate (S) at half the maximum rate (Vm) of enzymatic reaction | mM |
| 6 | *kcat*/*Km* | | An important parameter for measuring enzyme catalytic efficiency, it represents the efficiency of the enzyme in converting substrates into products per unit time. ‌ | s-1mM-1 |
| 7 | Enzyme_concentration | | The concentration of enzymes in the reaction system. | nM |
| 8 | C1_substrate_concentration | | The concentrations of CO2, HCO3-, methanol, formaldehyde, and formate in the reaction system. | mM |
| 9 | Other_substrate_concentration | | The concentrations of other substrates in the reaction system, except for C1_Substrate, NAD+, NADH, NADP+, ATP, Mg2+, Zn2+, Mn2+, etc | mM |
| 10 | pH | | pH value of the reaction system | NA |
| 11 | Temperature | | Temperature of the reaction system | ℃ |
| 12 | Buffer_name | | Name of buffer solution for reaction system | NA |
| 13 | NAD_conc | | Concentration of NAD+ in the reaction system | mM |
| 14 | NADH_conc | | Concentration of NADH in the reaction system | mM |
| 15 | NADP_conc | | Concentration of NADP+ in the reaction system | mM |
| 16 | ATP_conc | | The concentration of ATP in the reaction system | mM |
| 17 | Mg_conc | | Concentration of Mg2+ in the reaction system | mM |
| 18 | Zn_conc | | Concentration of Zn2+ in the reaction system | mM |
| 19 | Mn_conc | | Concentration of Mn2+ in the reaction system | mM |
| 20 | Reference | | References for enzyme kinetics determination | mM |

**Supplementary Table 2.** **Optimal parameters for paragraph classification model.**

| **Model** | | **Best parameters** |
| --- | --- | --- |
| **Paragraph Initial Classification Model** | | |
| DT | 'max_depth': 21, 'min_samples_split': 45, 'min_samples_leaf': 6 | |
| RF | 'n_estimators': 200, 'max_depth': 30, 'min_samples_split': 2, 'min_samples_leaf': 1 | |
| SVR | 'C': 100, 'gamma': 0.0001 | |
| XGB | 'n_estimators': 200, 'learning_rate': 0.1, 'max_depth': 7, 'min_child_weight': 1, 'gamma': 0.2, 'subsample': 0.6, 'colsample_bytree': 0.9, 'reg_lambda': 1, 'reg_alpha': 0.01 | |
| GBT | 'learning_rate': 0.25, 'n_estimators': 190, 'max_depth': 5, 'min_samples_split': 20, 'subsample': 0.85, 'max_features': None, 'min_samples_leaf': 5 | |
| NN | 'alpha': 5e-05, 'activation': ‘relu‘, 'solver': 'sgd', 'learning_rate_init': 0.001, 'hidden_layer_sizes': (100, 75) | |
| **Paragraph Reclassification Model** | | |
| DT | 'max_depth': 6, 'min_samples_split': 60, 'min_samples_leaf': 23 | |
| RF | 'n_estimators': 150, 'max_depth': 30, 'min_samples_split': 20, 'min_samples_leaf': 2 | |
| SVR | 'C': 100, 'gamma': 0.0005 | |
| XGB | 'n_estimators': 250, 'learning_rate': 0.05, 'max_depth': 9, 'min_child_weight': 1, 'gamma': 0, 'subsample': 1.0, 'colsample_bytree': 0.7, 'reg_lambda': 100, 'reg_alpha': 1 | |
| GBT | 'learning_rate': 0.2, 'n_estimators': 200, 'max_depth': 7, 'min_samples_split': 10, 'subsample': 0.8, 'max_features': sqrt, 'min_samples_leaf': 1 | |
| NN | 'alpha': 0.075, 'activation': ‘logistic‘, 'solver': 'sgd', 'learning_rate_init': 0.125, 'hidden_layer_sizes': (120, ) | |

**Supplementary Table 3. Sensitivity analysis results of different enzyme concentrations on the model.**

| **Enzyme concentration(nM)** | **Model** | **R2**  **Mean** | **R2 Std** | **MAE Mean** | **MAE Std** | **RMSE Mean** | **RMSE Std** |
| --- | --- | --- | --- | --- | --- | --- | --- |
| 1 | RF | 0.708 | 0.076 | 2.413 | 0.247 | 4.614 | 0.607 |
| 10 | XGB | 0.773 | 0.110 | 1.973 | 0.262 | 3.903 | 0.927 |
| 20 | RF | 0.771 | 0.077 | 2.006 | 0.256 | 3.971 | 0.773 |
| 30 | RF | 0.804 | 0.080 | 1.899 | 0.208 | 3.673 | 0.815 |
| 40 | RF | 0.789 | 0.076 | 1.906 | 0.196 | 3.719 | 0.175 |
| 50 | XGB | 0.807 | 0.071 | 1.787 | 0.029 | 3.550 | 0.380 |
| 60 | RF | 0.805 | 0.081 | 1.831 | 0.198 | 3.541 | 0.812 |
| 70 | XGB | 0.799 | 0.100 | 1.771 | 0.196 | 3.516 | 0.526 |
| 80 | XGB | 0.762 | 0.160 | 1.839 | 0.259 | 3.679 | 0.913 |
| 90 | RF | 0.821 | 0.065 | 1.769 | 0.252 | 3.392 | 0.537 |
| 100 | RF | 0.806 | 0.113 | 1.792 | 0.137 | 3.405 | 0.565 |
| 110 | RF | 0.827 | 0.059 | 1.755 | 0.221 | 3.351 | 0.557 |
| 120 | RF | 0.832 | 0.049 | 1.727 | 0.113 | 3.337 | 0.557 |
| 130 | RF | 0.824 | 0.106 | 1.690 | 0.199 | 3.232 | 0.621 |
| 140 | RF | 0.822 | 0.107 | 1.700 | 0.201 | 3.256 | 0.613 |
| 150 | RF | 0.828 | 0.062 | 1.731 | 0.275 | 3.327 | 0.558 |
| 160 | RF | 0.825 | 0.065 | 1.710 | 0.125 | 3.346 | 0.492 |
| 170 | RF | 0.828 | 0.066 | 1.698 | 0.146 | 3.316 | 0.476 |
| 180 | RF | 0.818 | 0.096 | 1.733 | 0.134 | 3.340 | 0.548 |
| 190 | RF | 0.818 | 0.097 | 1.734 | 0.139 | 3.340 | 0.552 |
| 200 | XGB | 0.817 | 0.072 | 1.751 | 0.214 | 3.396 | 0.518 |

**Supplementary Table 4. Performance of Six Models at Enzyme Concentration of 120, 150, 170 nM.**

| **Model** | **Enzyme concentration(nM)** | **R2**  **Mean** | **R2 Std** | **MAE Mean** | **MAE Std** | **RMSE Mean** | **RMSE Std** |
| --- | --- | --- | --- | --- | --- | --- | --- |
| DT | 120 | 0.813 | 0.066 | 1.730 | 0.140 | 3.484 | 0.467 |
| 150 | 0.812 | 0.070 | 1.760 | 0.330 | 3.469 | 0.577 |
| 170 | 0.809 | 0.092 | 1.731 | 0.270 | 3.436 | 0.592 |
| RF | 120 | 0.832 | 0.049 | 1.727 | 0.113 | 3.337 | 0.557 |
| 150 | 0.828 | 0.062 | 1.731 | 0.275 | 3.327 | 0.558 |
| 170 | 0.828 | 0.066 | 1.698 | 0.146 | 3.316 | 0.476 |
| SVR | 120 | 0.381 | 0.022 | 3.833 | 0.515 | 6.544 | 0.881 |
| 150 | 0.391 | 0.037 | 3.811 | 0.631 | 6.496 | 0.996 |
| 170 | 0.386 | 0.039 | 3.797 | 0.487 | 6.503 | 0.807 |
| XGB | 120 | 0.832 | 0.043 | 1.719 | 0.113 | 3.355 | 0.512 |
| 150 | 0.825 | 0.063 | 1.760 | 0.284 | 3.360 | 0.552 |
| 170 | 0.821 | 0.070 | 1.750 | 0.182 | 3.377 | 0.525 |
| GBT | 120 | 0.826 | 0.041 | 2.070 | 0.063 | 3.409 | 0.442 |
| 150 | 0.818 | 0.054 | 2.100 | 0.199 | 3.443 | 0.473 |
| 170 | 0.820 | 0.054 | 2.073 | 0.078 | 3.432 | 0.410 |
| NN | 120 | 0.710 | 0.072 | 2.502 | 0.253 | 4.383 | 0.342 |
| 150 | 0.651 | 0.140 | 2.584 | 0.303 | 4.744 | 1.038 |
| 170 | 0.630 | 0.174 | 2.583 | 0.224 | 4.791 | 0.812 |

**Supplementary Table 5. Distribution characteristics of reaction conditions level dataset.**

| Number | Column | Non-Null Count | mean | min | max |
| --- | --- | --- | --- | --- | --- |
| 0 | pH | 705 | 7.925 | 6.280 | 10.500 |
| 1 | Temperature | 708 | 26.906 | 0.000 | 85.000 |
| 2 | buffer_name | 699 | NA | NA | NA |
| 3 | NAD_concentration | 713 | 0.176 | 0.000 | 10.000 |
| 4 | NADH_concentration | 713 | 0.092 | 0.000 | 10.000 |
| 5 | NADP_concentration | 713 | 0.004 | 0.000 | 1.500 |
| 6 | ATP_concentration | 713 | 0.543 | 0.000 | 25.000 |
| 7 | Mg_concentration | 713 | 8.698 | 0.000 | 50.000 |
| 8 | Zn_concentration | 713 | 0.017 | 0.000 | 10.000 |
| 9 | Mn_concentration | 713 | 0.040 | 0.000 | 4.000 |
| 10 | ln(EIRBCFA) | 713 | -7.863 | -36.088 | -0.066 |

**Supplementary Table 6. Model performance after feature optimization.**

| **Model** | **Label** | **R2**  **Mean** | **R2 Std** | **MAE Mean** | **MAE Std** | **RMSE Mean** | **RMSE Std** |
| --- | --- | --- | --- | --- | --- | --- | --- |
| DT | Original features | 0.813 | 0.066 | 1.730 | 0.140 | 3.484 | 0.467 |
| Numerical Feature Optimization | 0.813 | 0.063 | 1.748 | 0.136 | 3.494 | 0.459 |
| Optimization of buffer_name | 0.815 | 0.079 | 1.709 | 0.114 | 3.428 | 0.496 |
| RF | Original features | 0.832 | 0.049 | 1.727 | 0.113 | 3.337 | 0.557 |
| Numerical Feature Optimization | 0.834 | 0.048 | 1.722 | 0.115 | 3.324 | 0.569 |
| Optimization of buffer_name | 0.834 | 0.068 | 1.682 | 0.118 | 3.264 | 0.568 |
| SVR | Original features | 0.381 | 0.022 | 3.833 | 0.515 | 6.544 | 0.881 |
| Numerical Feature Optimization | 0.405 | 0.020 | 3.788 | 0.495 | 6.409 | 0.834 |
| Optimization of buffer_name | 0.435 | 0.024 | 3.757 | 0.516 | 6.251 | 0.845 |
| XGB | Original features | 0.832 | 0.043 | 1.719 | 0.113 | 3.355 | 0.512 |
| Numerical Feature Optimization | 0.832 | 0.043 | 1.717 | 0.113 | 3.351 | 0.502 |
| Optimization of buffer_name | 0.826 | 0.070 | 1.674 | 0.114 | 3.342 | 0.498 |
| GBT | Original features | 0.826 | 0.041 | 2.070 | 0.063 | 3.409 | 0.442 |
| Numerical Feature Optimization | 0.826 | 0.041 | 2.072 | 0.065 | 3.409 | 0.437 |
| Optimization of buffer_name | 0.830 | 0.059 | 1.915 | 0.058 | 3.324 | 0.463 |
| NN | Original features | 0.710 | 0.072 | 2.502 | 0.253 | 4.383 | 0.342 |
| Numerical Feature Optimization | 0.660 | 0.134 | 2.548 | 0.361 | 4.713 | 0.952 |
| Optimization of buffer_name | 0.632 | 0.194 | 2.575 | 0.328 | 4.858 | 1.290 |

**Supplementary Table 7. Optimal parameters for 6 different models at the level of reaction conditions.**

| **Model** | **Best parameters** |
| --- | --- |
| DT | 'max_depth': 15, 'min_samples_split': 6, 'min_samples_leaf': 2 |
| RF | 'n_estimators': 262, 'max_depth': 28, 'min_samples_split': 10, 'min_samples_leaf': 1 |
| SVR | 'C': 47.67062642599171, 'gamma': 0.9992222036857874 |
| XGB | 'n_estimators': 613, 'learning_rate': 0.011228056664544099, 'max_depth': 6, 'min_child_weight': 1, 'gamma': 0.0014714120840634097, 'subsample': 0.8543470841308846, 'colsample_bytree': 0.5055499880368172, 'reg_lambda': 0.3098534134838144, 'reg_alpha': 0.005178637626448989 |
| GBT | 'learning_rate': 0.14598744182902113, 'n_estimators': 71, 'max_depth': 12, 'min_samples_split': 10, 'min_samples_leaf': 2, 'subsample': 0.7140036530946019, 'max_features': 'log2' |
| NN | 'hidden_layer_sizes': (100, 50, 50), 'activation': 'tanh', 'solver': 'adam', 'alpha': 0.00019301757304152864, 'learning_rate_init': 0.0031910857289852656 |

**Supplementary Table 8. Performance comparison of 5 cross validations based on optimal parameters at the level of reaction conditions (for the test set).**

| **Model** | **R2**  **Mean** | **R2 Std** | **MAE Mean** | **MAE Std** | **RMSE Mean** | **RMSE Std** |
| --- | --- | --- | --- | --- | --- | --- |
| DT | 0.830 | 0.067 | 1.801 | 0.077 | 3.309 | 0.540 |
| RF | 0.839 | 0.063 | 1.713 | 0.104 | 3.225 | 0.565 |
| SVR | 0.838 | 0.041 | 1.692 | 0.159 | 3.315 | 0.628 |
| XGB | 0.825 | 0.086 | 1.681 | 0.142 | 3.310 | 0.485 |
| GBT | 0.853 | 0.043 | 1.667 | 0.109 | 3.148 | 0.629 |
| NN | 0.846 | 0.040 | 1.743 | 0.221 | 3.250 | 0.682 |

**Supplementary Table 9. Optimal Parameters for Six Different Models at the Protein Level.**

| **Model** | **Best parameters** |
| --- | --- |
| DT | 'max_depth': 15, 'min_samples_split': 6, 'min_samples_leaf': 2 |
| RF | 'n_estimators': 800, 'max_depth': 9, 'min_samples_split': 8, 'min_samples_leaf': 1 |
| SVR | 'C': 97.47186982086818, 'gamma': 0.09657889250639418 |
| XGB | 'n_estimators': 400, 'learning_rate': 0.06909897984434987, 'max_depth': 9, 'min_child_weight': 3, 'gamma': 0.016796433530759543, 'subsample': 0.9068286369744826, 'colsample_bytree': 0.515539644521751, 'reg_lambda': 0.008538978664617074, 'reg_alpha': 0.0030448181348685702 |
| GBT | 'learning_rate': 0.039291914144639555, 'n_estimators': 650, 'max_depth': 13, 'min_samples_split': 15, 'subsample': 0.798462977516792, 'max_features': 0.6632479140681664, 'min_samples_leaf': 6 |
| NN | 'alpha': 1.7198489486244327e-05, 'activation': 'tanh', 'solver': 'lbfgs', 'learning_rate_init': 0.001070658620629574, 'hidden_layer_sizes': (100, 100) |

**Supplementary Table 10. Model performance of feature selection and parameter optimization process(for the test set).**

| **Model** | **Label** | **R2 Mean** | **R2 Std** | **MAE Mean** | **MAE Std** | **RMSE Mean** | **RMSE Std** |
| --- | --- | --- | --- | --- | --- | --- | --- |
| DT | Original | 0.887 | 0.099 | 1.449 | 0.240 | 2.807 | 1.188 |
| PCA | 0.918 | 0.042 | 1.409 | 0.248 | 2.517 | 0.764 |
| Tree FE | 0.938 | 0.010 | 1.318 | 0.152 | 2.223 | 0.254 |
| RFE(3000) | 0.902 | 0.077 | 1.434 | 0.219 | 2.648 | 1.003 |
| RFE(2000) | 0.890 | 0.098 | 1.426 | 0.220 | 2.771 | 1.186 |
| RFE(1000) | 0.940 | 0.010 | 1.286 | 0.054 | 2.180 | 0.227 |
| RFE(500) | 0.945 | 0.014 | 1.206 | 0.102 | 2.084 | 0.243 |
| RFE(100) | 0.897 | 0.084 | 1.419 | 0.184 | 2.705 | 1.072 |
| Lasso FE | 0.941 | 0.020 | 1.247 | 0.127 | 2.123 | 0.311 |
| Bay Tun | 0.896 | 0.090 | 1.422 | 0.226 | 2.700 | 1.125 |
| RF | Original | 0.922 | 0.022 | 1.432 | 0.135 | 2.492 | 0.441 |
| PCA | 0.915 | 0.037 | 1.480 | 0.250 | 2.566 | 0.691 |
| Tree FE | 0.931 | 0.023 | 1.350 | 0.113 | 2.326 | 0.440 |
| RFE(3000) | 0.932 | 0.014 | 1.395 | 0.127 | 2.332 | 0.327 |
| RFE(2000) | 0.925 | 0.021 | 1.413 | 0.103 | 2.430 | 0.371 |
| RFE(1000) | 0.933 | 0.018 | 1.370 | 0.140 | 2.312 | 0.400 |
| RFE(500) | 0.930 | 0.019 | 1.365 | 0.136 | 2.349 | 0.394 |
| RFE(100) | 0.937 | 0.016 | 1.322 | 0.090 | 2.222 | 0.339 |
| Lasso FE | 0.949 | 0.012 | 1.262 | 0.087 | 1.994 | 0.192 |
| Bay Tun | 0.926 | 0.019 | 1.422 | 0.119 | 2.427 | 0.380 |
| SVR | Original | 0.450 | 0.031 | 4.123 | 0.470 | 6.658 | 0.611 |
| PCA | 0.450 | 0.046 | 4.191 | 0.528 | 6.659 | 0.677 |
| Tree FE | 0.643 | 0.103 | 2.666 | 0.477 | 5.291 | 0.964 |
| RFE(3000) | 0.511 | 0.035 | 3.927 | 0.484 | 6.281 | 0.627 |
| RFE(2000) | 0.584 | 0.035 | 3.573 | 0.455 | 5.789 | 0.594 |
| RFE(1000) | 0.608 | 0.049 | 3.543 | 0.410 | 5.610 | 0.587 |
| RFE(500) | 0.635 | 0.104 | 2.769 | 0.496 | 5.347 | 0.970 |
| RFE(100) | 0.651 | 0.095 | 2.648 | 0.458 | 5.240 | 0.922 |
| Lasso FE | 0.472 | 0.042 | 4.097 | 0.536 | 6.526 | 0.660 |
| Bay Tun | 0.683 | 0.092 | 2.239 | 0.391 | 4.976 | 0.929 |
| XGB | Original | 0.920 | 0.043 | 1.322 | 0.177 | 2.483 | 0.784 |
| PCA | 0.935 | 0.027 | 1.282 | 0.178 | 2.241 | 0.563 |
| Tree FE | 0.920 | 0.045 | 1.313 | 0.185 | 2.478 | 0.837 |
| RFE(3000) | 0.920 | 0.043 | 1.327 | 0.175 | 2.498 | 0.781 |
| RFE(2000) | 0.920 | 0.043 | 1.328 | 0.175 | 2.499 | 0.780 |
| RFE(1000) | 0.921 | 0.040 | 1.316 | 0.165 | 2.474 | 0.745 |
| RFE(500) | 0.948 | 0.014 | 1.198 | 0.089 | 2.019 | 0.237 |
| RFE(100) | 0.952 | 0.013 | 1.177 | 0.102 | 1.944 | 0.220 |
| Lasso FE | 0.954 | 0.013 | 1.169 | 0.089 | 1.898 | 0.197 |
| Bay Tun | 0.924 | 0.036 | 1.316 | 0.197 | 2.448 | 0.708 |

**Supplementary Table 10 continued. Model performance of feature selection and parameter optimization process(for the test set).**

| **Model** | **Label** | **R2 Mean** | **R2 Std** | **MAE Mean** | **MAE Std** | **RMSE Mean** | **RMSE Std** |
| --- | --- | --- | --- | --- | --- | --- | --- |
| GBT | Original | 0.929 | 0.036 | 1.289 | 0.175 | 2.333 | 0.677 |
| PCA | 0.928 | 0.032 | 1.474 | 0.266 | 2.357 | 0.619 |
| Tree FE | 0.944 | 0.017 | 1.255 | 0.153 | 2.104 | 0.426 |
| RFE(3000) | 0.937 | 0.023 | 1.276 | 0.156 | 2.225 | 0.505 |
| RFE(2000) | 0.928 | 0.039 | 1.292 | 0.171 | 2.343 | 0.690 |
| RFE(1000) | 0.944 | 0.016 | 1.248 | 0.150 | 2.117 | 0.399 |
| RFE(500) | 0.934 | 0.026 | 1.301 | 0.139 | 2.275 | 0.517 |
| RFE(100) | 0.946 | 0.014 | 1.242 | 0.131 | 2.081 | 0.370 |
| Lasso FE | 0.955 | 0.012 | 1.210 | 0.062 | 1.877 | 0.187 |
| Bay Tun | 0.937 | 0.023 | 1.260 | 0.150 | 2.228 | 0.513 |
| NN | Original | 0.771 | 0.069 | 2.350 | 0.246 | 4.232 | 0.627 |
| PCA | 0.495 | 0.054 | 4.032 | 0.513 | 6.374 | 0.701 |
| Tree FE | 0.722 | 0.061 | 2.663 | 0.388 | 4.697 | 0.695 |
| RFE(3000) | 0.770 | 0.071 | 2.347 | 0.298 | 4.238 | 0.664 |
| RFE(2000) | 0.783 | 0.060 | 2.276 | 0.254 | 4.126 | 0.574 |
| RFE(1000) | 0.765 | 0.072 | 2.361 | 0.379 | 4.292 | 0.738 |
| RFE(500) | 0.755 | 0.057 | 2.455 | 0.279 | 4.398 | 0.529 |
| RFE(100) | 0.693 | 0.070 | 2.863 | 0.390 | 4.937 | 0.744 |
| Lasso FE | 0.693 | 0.078 | 2.752 | 0.388 | 4.915 | 0.778 |
| Bay Tun | 0.860 | 0.108 | 2.020 | 0.438 | 3.123 | 0.967 |

**Supplementary Table 11.** The full name and abbreviation of enzymes in the new dataset.

| The full name of enzyme | Abbreviation for enzyme | The full name of enzyme | Abbreviation for enzyme | The full name of enzyme | Abbreviation for enzyme |
| --- | --- | --- | --- | --- | --- |
| alcohol dehydrogenase | ADH | glycolaldehyde synthase | GALS | methanol dehydrogenase | MDH |
| formolase | FLS | propionyl-CoA synthase | PCS | acetyl-CoA carboxylase | ACC |
| ribulose-bisphosphate carboxylase | Rubisco | phosphopyruvate carboxylase | PEPC | acyl-CoA reductase | ACR |
| formate-tetrahydrofolate ligase | FTFL‌ | Isocitrate dehydrogenase | IDH | Phosphoenolpyruvate carboxykinase | PEPCK |
| oxalyl-CoA decarboxylase | OCD | 2-hydroxyacyl-CoA synthase | HACS | Aldolase | ADL |
| glyoxylate carboligase | GCL | Lactaldehyde reductase | FucO | 1,3-propanediol dehydrogenase | DhaT |
| α-ketoglutaric semialdehyde dehydrogenase | KGSADH | formate dehydrogenase | FDH | formaldehyde dehydrogenase | FaldDH |
| acetate kinase | AckA | alcohol oxidase | AOX |  |  |

**Supplementary Table 12.** The base sequence of FLS wild-type enzyme in this study.

| **Enzyme name** | **Sequence** |
| --- | --- |
| **FLS** | ATGGCTATGATTACTGGTGAACTGGTTGTTACCCTGATTAAAGCTGGCGTAGAACATCTGTTTGGCCTGCATGGCATTCATATIGACACCATTTTTTCAGGCTTGCCTGGACCACGACGTCCCAATCATTGATACTCGCCACGAAGCGGCGGCAGGCACGCTGCGGAAGGTTATGCCGCGCGCGCCTAACTGGTGTTGCCTGGTGACCGCTGGCTTTACCAATGCCGTTACGCGATCGCGAACGCTCGGACCGATCGCACTCCGGTTCTCCTGACCGGTTCTGCTCTTCGTGATGACGAACCAACACCCTGCAGGCCGGTATTGATCAGGTGGCCATGGCGCCCCGATCACGAATGGGCTCATCGTGTTATGGCAACTGAACACATCCCGCGTCTGGTTATGCAGGCCATTCGTGCCCCCCACGTGGCCGGTGCTGCTGGATCTGCCATGGACATCCTGATGACCAATCGATGAAGATTCCGTTATCATCCCAGACCTGGTGCTCTGCTCACGGTGCATCCAGACCCGCTGACCTGGACCAGCTCTGGCACTGCTGCGTAAGCGAACGCCAGTTATCGTACTGGCTCCGAGGCGTCCCCCACCACGCAAGACCGCACTGAGCGCATTCGTAGCGCGACCGTACCGGTTTCGCTGACTATGAAGGCCTGTCCATGCTGAGCGCTGCCGGACGCTATGCGTGGCCTGGTGCAGAACCTGTACTCCTTGCAAAGCTGATGCAGCTCCGGACCTGGTACTGATGCTGGGTGCTCGTTCGGTCTGAACACCGGTCATGGTTCCGGTCAACTGATCCCCATTCTGCTCAGGTGATCCAGGTGGATCCAGACGCGTGAACTGGGTCGCTGCAAGGCATCGCGCTGGCTATCGTGCTGATGTAGGTGGCACCATTGAAGCGCTGGCTCAGGCGACACAGGACGCCGCGCGCCGGACCGCGCGACTGGTGCCAAGGTAACTGACCTGGCCAGGAGCGTTACGCTTCCATCGCGCTAAATCCAGCTCTGAACATGCCTGCACCCCTTCOACGCTTCTCAGGTTATCGCGAACACGTGGACGCAGGCGTGACCGTCGTTGCGGATGGTGGCCTGACTTATCTGTGGCTCCGAAGTTATGTCGTCTCAAACCAGGCGCTTCCTGTGCCACGGCTATCTGAACAGCATGGTAGGCTTCGGTACTGCCTGGGTGCGCAGGTTGCGGATCTGGAGGCAGGTCGTACCATCCTGGTGACCGGACGCTCTGTTGGTTATTCCATTGGCGAATTCGACACCCTGGTACGCAACAGCTGCCCCTGATTGTAATTATCAACAACCAGTCTTGGCTGGACCCTGCACTTCAGCAGCTGGCCGTTGGTAACCGTGTCACCGCACCCCCCTGGAAATGGTTCCTATCACGGCGTTGCTGCGCATTCGGTGCTGATGGTTACCACGTCGACTCTCGAGAGCTTCAGCGCCCTCTGGCTCAGGCACTGGCACACAACCGCCCGCATGCATCAACGTTGCTGCTGGCCTGGACCCGATCCCCGCAGGAACTGATCCTGATTGGCATGGACCGTTTGCGCTCCACGGAGAATCTATTTCCAATCCGGCGCG |

**Supplementary Table 13.** FLS enzyme mutants and their primers in this study.

| **Primers** | **Sequences (5’-3’)** |
| --- | --- |
| F484E-F | CTGCACGAACAGCAGCTGGCCGTTGGTCCTAA |
| F484E-R | AGCTGCTGTTCGTGCAGGGTCCAGCCCCAAGA |
| I28L-F | GCATGGCCTGCATATTGACACCATTTTTCAGGCT |
| I28L-R | CAATATGCAGGCCATGCAGGCCAAACAGATGT |
| I28W-F | GCATGGCTGGCATATTGACACCATTTTTCAGGCT |
| I28W-R | CAATATGCCAGCCATGCAGGCCAAACAGATGT |
| N238G-F | TCGTTTCGGTCTGGGTACCGGTCATGGTTCCGGT |
| N238G-R | TACCCAGACCGAAACGAGCACCCAGCATCAGT |
| N238Y-F | TCGGTCTGTATACCGGTCATGGTTCCGGTCAA |
| N238Y-R | ACCGGTATACAGACCGAAACGAGCACCCAGCA |
| T90M-F | AACGCTCGGATGGATCGCACTCCGGTTCTGTTC |
| T90M-R | CGATCCATCCGAGCGTTCGCGATCGGCGTAAC |
